# Supplementary material for: N-Heterocyclic carbene catalyzed asymmetric [3 + 3] cycloaddtion of β,β-disubstituted, α,β-unsaturated carboxylic esters with 3-aminobenzofurans
Source: Royal Society of Chemistry journal article supplement (doi:10.1039/d0qo01489c), 2021-01-01
Supplement: d0qo01489c1.pdf [file d0qo01489c1.pdf]

## Supporting Information

### N-Heterocyclic carbene catalyzed asymmetric [3 + 3] cycloaddition of $\beta,\beta$ -disubstituted, $\alpha,\beta$ -unsaturated carboxylic esters with 3-aminobenzofurans

Chonglong He,<sup>a</sup> Yipeng Zhou,<sup>a</sup> Zhanhuan Li,<sup>a</sup> Jianfeng Xu,<sup>a,\*</sup> and Xingkuan Chen<sup>b,\*</sup>

<sup>a</sup> Department of Chemistry, Zhejiang Sci-Tech University, Hangzhou 310018, P. R. China

<sup>b</sup> Department of Chemistry, Jinan University, Guangzhou 510632, China.

e-mail: [jfxu@zstu.edu.cn](mailto:jfxu@zstu.edu.cn), [xkchen@jnu.edu.cn](mailto:xkchen@jnu.edu.cn)

#### Table of Contents

|    |                                                                    |     |
|----|--------------------------------------------------------------------|-----|
| I  | ▪ General information                                              | S1  |
|    | ▪ General procedure for the [3 + 3] cycloaddition reaction         | S2  |
|    | ▪ Gram-scale preparation and synthetic transformation of <b>3a</b> | S2  |
|    | ▪ References cited in the SI                                       | S3  |
|    | ▪ X-ray structure of product <b>3b</b>                             | S4  |
|    | ▪ Characterization of products                                     | S6  |
| II | <sup>1</sup> H, <sup>13</sup> C NMR and HPLC spectra               | S12 |

#### General Information

Commercially available materials purchased from Energy-Chemical were used as received. Proton nuclear magnetic resonance (<sup>1</sup>H NMR) spectra were recorded on a Bruker AV 400 (400 MHz) spectrometer. Chemical shifts were recorded in parts per million (ppm,  $\delta$ ) relative to tetramethylsilane ( $\delta$  0.00) or chloroform ( $\delta$  = 7.26, singlet). <sup>1</sup>H NMR splitting patterns are designated as singlet (s), doublet (d), triplet (t), quartet (q), dd (doublet of doublets); m (multiplets), and etc. All first-order splitting patterns were assigned on the basis of the appearance of the multiplet. Splitting patterns that could not be easily interpreted are designated as multiplet (m) or broad (br). Carbon nuclear magnetic resonance (<sup>13</sup>C NMR) spectra were recorded on a Bruker AV 400 (400 MHz) spectrometer. High resolution mass spectral analysis (HRMS) was performed on Waters Xevo G2-S QToF mass spectrometer. The determination of ee was performed via chiral HPLC analysis using Waters Empower 3 HPLC system. X-ray crystallography analysis was performed on Bruker X8 APEX X-ray diffractionmeter. Optical rotations were measured using a 1 mL cell with a 1 dm path length on a Rudolph Autopol IV automatic polarimeter and are reported as follows:  $[\alpha]_D^{25}$  (c in g per 100 mL solvent). Analytical thin-layer chromatography (TLC) was carried out on GF 254 silica gel coated plates. Flash column chromatography was carried out using 200–300 mesh silica gel. Melting points are uncorrected.  $\beta,\beta$ -disubstituted,  $\alpha,\beta$ -unsaturated carboxylic esters<sup>1</sup> and 3-aminobenzofurans<sup>2</sup> were synthesized according to reported method. NHC pre-catalyst **A**<sup>3</sup> and **D**<sup>4</sup> were prepared by known protocol.

## General procedure for the [3 + 3] cycloaddition reaction:

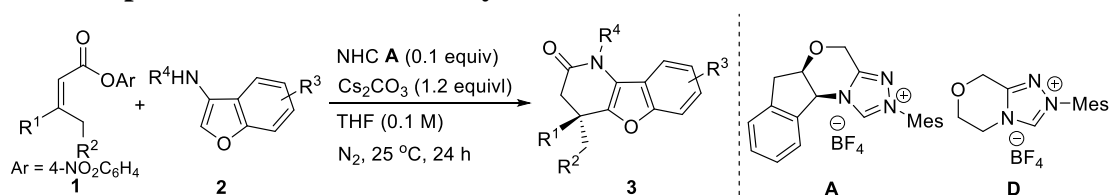

To a dry 10 mL Schlenk tube equipped with a magnetic stir bar, were added chiral NHC pre-catalyst **A** (4.2 mg, 0.01 mmol),  $\beta,\beta$ -disubstituted,  $\alpha,\beta$ -unsaturated carboxylic ester **1** (0.12 mmol), 3-aminobenzofurans **2** (0.1 mmol), and  $\text{Cs}_2\text{CO}_3$  (39.1 mg, 0.12 mmol). The tube was sealed with a septum, evacuated and refilled with nitrogen (3 cycles). THF (1 mL) was then added and the reaction mixture was stirred at 25 °C for 24 hours. After completion of the reaction, the reaction mixture was concentrated under reduced pressure and the residue was subjected to column chromatography using petroleum ether/EtOAc = 5/1 as eluent to afford the desired products **3**.

*Note:* The corresponding racemic products for HPLC analysis were synthesized following the same procedure by using NHC pre-catalyst **D** as the achiral catalyst.

## Gram-scale preparation of **3a**:

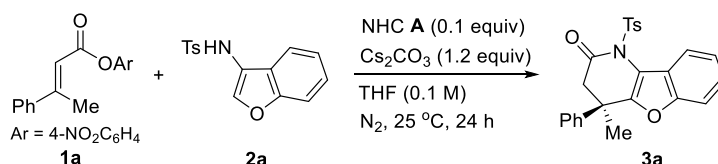

To a 100 mL two-neck round-bottom flask equipped with a magnetic stir bar, were added chiral NHC pre-catalyst **A** (125.7 mg, 0.3 mmol),  $\beta,\beta$ -disubstituted,  $\alpha,\beta$ -unsaturated carboxylic ester **1a** (1.021 g, 3.6 mmol), 3-aminobenzofuran **2a** (861.9 mg, 3 mmol), and  $\text{Cs}_2\text{CO}_3$  (1.173 g, 3.6 mmol). The flask was sealed with a septum, evacuated and refilled with nitrogen (3 cycles). THF (30 mL) was then added and the reaction mixture was stirred at 25 °C for 24 hours. After completion of the reaction, the reaction mixture was concentrated under reduced pressure and the residue was subjected to column chromatography using petroleum ether/EtOAc = 5/1 as eluent to afford the desired product **3a** (1.176 g, 2.73 mmol, 91% yield, 98% ee).

## Synthetic transformation of **3a**:

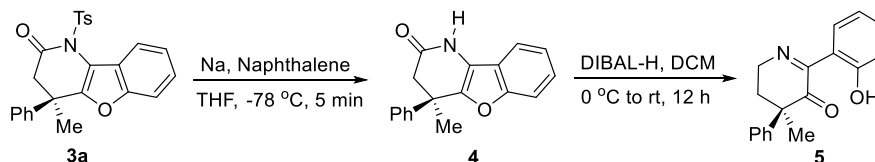

Under a nitrogen atmosphere, to a freshly prepared solution of Na (23 mg, 1 mmol, 10 equiv.) and naphthalene (128 mg, 1 mmol, 10 equiv.) in anhydrous THF (7 mL) at -78 °C, was added a solution of **3a** (43.2 mg, 0.1 mmol, 98% ee) in THF (3 mL). The reaction mixture was stirred at that temperature for 5 minutes and then quenched with saturated  $\text{NH}_4\text{Cl}$  aq. (10 mL). The aqueous phase was extracted with  $\text{CH}_2\text{Cl}_2$ , and the combined organic phase was washed with brine, dried over  $\text{Na}_2\text{SO}_4$ . Filtration and

removal of solvent under reduced pressure afforded a residue, which was purified by column chromatography using petroleum ether/EtOAc = 3/1 as eluent to afford the desired product **4** (23.1 mg, 0.083 mmol, 83% yield, 98% ee).

Under a nitrogen atmosphere, to a solution of **4** (27.7 mg, 0.1 mmol, 98% ee) in anhydrous DCM (2 mL) at 0 °C, was added DIBAL-H (2 mL of a 1.5 M solution in toluene, 3 mmol, 30 equiv.) dropwise. The reaction mixture was allowed to warm to room temperature and stirred for 12 hours before it was quenched with brine (10 mL). The aqueous phase was extracted with EtOAc, and the combined organic phase was dried over Na<sub>2</sub>SO<sub>4</sub>. Filtration and removal of solvent under reduced pressure afforded a residue, which was purified by column chromatography using petroleum ether/EtOAc = 5/1 as eluent to afford the desired product **5** (19.9 mg, 0.071 mmol, 71% yield, 98% ee).

#### References cited in the SI:

1. J. Xu, Z. Jin and Y. R. Chi, *Org. Lett.*, 2013, **15**, 5028.
2. X. F. Ding, R. H. Su, W. L. Yang and W. P. Deng, *Adv. Synth. Catal.*, 2018, **360**, 4168.
3. M. He, J. R. Struble and J. W. Bode, *J. Am. Chem. Soc.*, 2006, **128**, 8418.
4. P. C. Chiang, M. Rommel and J. W. Bode, *J. Am. Chem. Soc.*, 2009, **131**, 8714.

### X-ray structure of product **3b** (ellipsoid contour at 30% probability)

Absolute configurations of the products **3** were assigned based on the crystal X-ray structures of **3b**. CCDC 2040018 (**3b**, obtained as colorless needles *via* evaporation of a petroleum ether/CH<sub>2</sub>Cl<sub>2</sub> solution) contains the supplementary X-ray crystallographic data. These data can be obtained free of charge from The Cambridge Crystallographic Data Centre via [www.ccdc.cam.ac.uk/data\\_request/cif](http://www.ccdc.cam.ac.uk/data_request/cif).

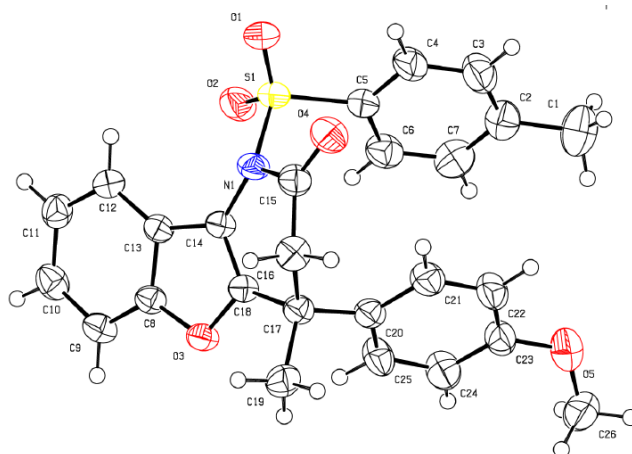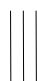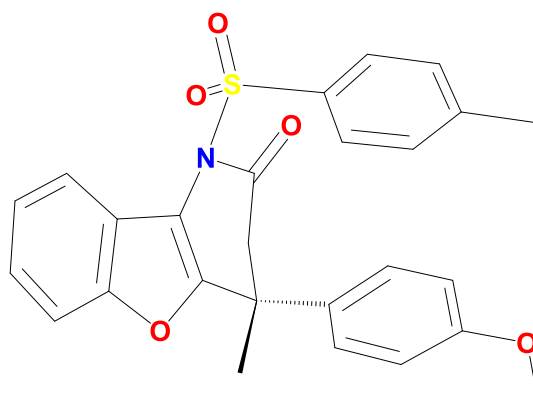

**3b**

**Table S1. Crystal data and structure refinement for 3b.**

|                                   |                                                   |            |
|-----------------------------------|---------------------------------------------------|------------|
| Empirical formula                 | C <sub>26</sub> H <sub>23</sub> NO <sub>5</sub> S |            |
| Formula weight                    | 461.51                                            |            |
| Temperature                       | 293(2) K                                          |            |
| Wavelength                        | 1.54184 Å                                         |            |
| Crystal system, Space group       | orthorhombic,                                     | P 21 21 21 |
| Unit cell dimensions              | a = 9.5921(4) Å                                   | α = 90 °   |
|                                   | b = 9.8807(3) Å                                   | β = 90 °   |
|                                   | c = 23.3768(10) Å                                 | γ = 90 °   |
| Volume                            | 2215.58(15) Å <sup>3</sup>                        |            |
| Z                                 | 4                                                 |            |
| Density (calculated)              | 1.384 Mg/m <sup>3</sup>                           |            |
| Absorption coefficient            | 1.628 mm <sup>-1</sup>                            |            |
| F(000)                            | 968                                               |            |
| Crystal size                      | 0.12*0.12*0.11 mm <sup>3</sup>                    |            |
| Theta range for data collection   | 3.78 to 67.21 °                                   |            |
| Index ranges                      | -11 ≤ h ≤ 7, -11 ≤ k ≤ 10, -27 ≤ l ≤ 27           |            |
| Reflections collected             | 5570                                              |            |
| Independent reflections           | 3472 [R(int) = 0.0281]                            |            |
| Completeness to theta= 67.23      | 99.8%                                             |            |
| Absorption correction             | Multi-scan from equivalents                       |            |
| Max. and min. transmission        | 0.8413 and 0.8286                                 |            |
| Refinement method                 | Full-matrix least-squares on F <sup>2</sup>       |            |
| Data/restraints/parameters        | 3472 / 0 / 302                                    |            |
| Goodness-of-fit on F <sup>2</sup> | 1.026                                             |            |
| Final R indices [I > 2σ(I)]       | R1 = 0.0404, wR2 = 0.0964                         |            |
| R indices(all data)               | R1 = 0.0472, wR2 = 0.1021                         |            |
| Extinction coefficient            | 0.0046(3)                                         |            |
| Largest diff. peak and hole       | 0.169 and -0.209 e.Å <sup>-3</sup>                |            |

## Characterization of products:

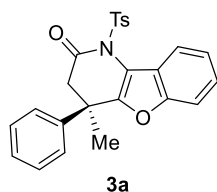

**(R)-4-Methyl-4-phenyl-1-tosyl-3,4-dihydrobenzofuro[3,2-b]pyridin-2(1H)-one (3a):** 40.2 mg, 93% yield; yellow solid, 183-185 °C. <sup>1</sup>H NMR (400 MHz, CDCl<sub>3</sub>) δ 8.08-8.06 (m, 1H), 7.57-7.55 (m, 1H), 7.40-7.35 (m, 4H), 7.18 (t, *J* = 6.4 Hz, 1H), 7.13-7.08 (m, 4H), 6.90 (d, *J* = 8.4 Hz, 2H), 3.24 (d, *J* = 15.6 Hz, 1H), 2.87 (d, *J* = 16.0 Hz, 1H), 2.32 (s, 3H), 1.64 (s, 3H); <sup>13</sup>C NMR (100 MHz, CDCl<sub>3</sub>) δ 169.3, 154.2, 150.9, 144.4, 143.6, 134.6, 128.9, 128.8, 128.6, 126.9, 125.4, 124.7, 123.5, 123.4, 122.7, 118.0, 111.6, 47.6, 39.6, 27.2, 21.6; HRMS (ESI, *m/z*): calcd. for C<sub>25</sub>H<sub>21</sub>NO<sub>4</sub>SH<sup>+</sup> 432.1264, found 432.1266. [ $\alpha$ ]<sup>27</sup><sub>D</sub> = -90.0 (*c* = 0.25 in CH<sub>2</sub>Cl<sub>2</sub>); HPLC analysis: 98% ee, [CHIRALPAK IA column; 1 mL/min; solvent system: *i*-PrOH/hexane = 20:80; retention times: 8.2 min (minor), 14.0 min (major)].

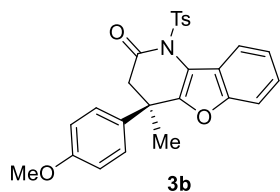

**(R)-4-(4-Methoxyphenyl)-4-methyl-1-tosyl-3,4-dihydrobenzofuro[3,2-b]pyridin-2(1H)-one (3b):** 45.2 mg, 98% yield; yellow solid, 161-163 °C. <sup>1</sup>H NMR (400 MHz, CDCl<sub>3</sub>) δ 8.07-8.05 (m, 1H), 7.56-7.54 (m, 1H), 7.40 (d, *J* = 8.4 Hz, 2H), 7.37-7.33 (m, 2H), 6.99 (d, *J* = 8.8 Hz, 2H), 6.92 (d, *J* = 8.0 Hz, 2H), 6.63 (d, *J* = 8.8 Hz, 2H), 3.79 (s, 3H), 3.19 (d, *J* = 15.6 Hz, 1H), 2.85 (d, *J* = 16.0 Hz, 1H), 2.34 (s, 3H), 1.61 (s, 3H); <sup>13</sup>C NMR (100 MHz, CDCl<sub>3</sub>) δ 169.4, 158.6, 154.1, 151.4, 144.4, 135.6, 134.7, 128.8, 128.6, 126.5, 124.6, 123.5, 122.6, 117.8, 115.6, 114.1, 111.6, 55.2, 47.6, 39.0, 27.2, 21.5; HRMS (ESI, *m/z*): calcd. for C<sub>26</sub>H<sub>23</sub>NO<sub>5</sub>SH<sup>+</sup> 462.1370, found 462.1370. [ $\alpha$ ]<sup>27</sup><sub>D</sub> = -89.2 (*c* = 0.25 in CH<sub>2</sub>Cl<sub>2</sub>); HPLC analysis: 99% ee, [CHIRALPAK IA column; 1 mL/min; solvent system: *i*-PrOH/hexane = 20:80; retention times: 10.2 min (minor), 15.4 min (major)].

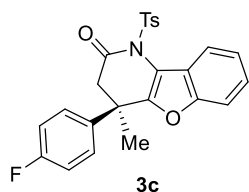

**(R)-4-(4-Fluorophenyl)-4-methyl-1-tosyl-3,4-dihydrobenzofuro[3,2-b]pyridin-2(1H)-one (3c):** 43.1 mg, 96% yield; yellow solid, 194-196 °C. <sup>1</sup>H NMR (400 MHz, CDCl<sub>3</sub>) δ 8.08-8.06 (m, 1H), 7.56-7.54 (m, 1H), 7.41 (d, *J* = 8.4 Hz, 2H), 7.38-7.34 (m, 2H), 7.05-7.01 (m, 2H), 6.95 (d, *J* = 8.0 Hz, 2H), 6.75 (t, *J* = 8.4 Hz, 2H), 3.19 (d, *J* = 15.6 Hz, 1H), 2.87 (d, *J* = 16.0 Hz, 1H), 2.36 (s, 3H), 1.61 (s, 3H); <sup>13</sup>C NMR (100 MHz, CDCl<sub>3</sub>) δ 169.2, 161.7 (d, *J*<sub>C-F</sub> = 244.7 Hz), 154.1, 151.0, 144.8, 139.5 (d, *J*<sub>C-F</sub> = 2.9 Hz), 134.5, 128.8, 128.7, 127.1 (d, *J*<sub>C-F</sub> = 8.1 Hz), 124.8, 123.6, 123.4, 122.7, 118.1, 115.5 (d, *J*<sub>C-F</sub> = 21.3 Hz), 111.6, 47.6, 39.1, 27.2, 21.4; HRMS (ESI, *m/z*): calcd. for C<sub>25</sub>H<sub>20</sub>FNO<sub>4</sub>SH<sup>+</sup> 450.1170, found 450.1173. [ $\alpha$ ]<sup>27</sup><sub>D</sub> = -77.2 (*c* = 0.25 in CH<sub>2</sub>Cl<sub>2</sub>); HPLC analysis: 99% ee, [CHIRALPAK IA column; 1 mL/min; solvent system: *i*-PrOH/hexane = 20:80; retention times: 7.6 min (minor), 13.4 min (major)].

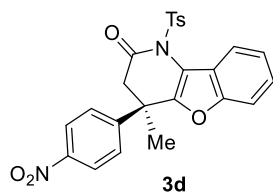

**(R)-4-Methyl-4-(4-nitrophenyl)-1-tosyl-3,4-dihydrobenzofuro[3,2-b]pyridin-2(1H)-one (3d):** 42.9 mg, 90% yield; yellow solid, 170-172 °C. <sup>1</sup>H NMR (400 MHz, CDCl<sub>3</sub>) δ 8.09-

8.07 (m, 1H), 7.91 (d,  $J = 8.8$  Hz, 2H), 7.59-7.57 (m, 1H), 7.45-7.36 (m, 4H), 7.25 (d,  $J = 8.0$  Hz, 2H), 6.91 (d,  $J = 8.4$  Hz, 2H), 3.25 (d,  $J = 15.6$  Hz, 1H), 2.97 (d,  $J = 15.6$  Hz, 1H), 2.29 (s, 3H), 1.69 (s, 3H);  $^{13}\text{C}$  NMR (100 MHz,  $\text{CDCl}_3$ )  $\delta$  168.8, 154.3, 151.0, 149.6, 146.7, 145.4, 134.4, 128.9, 128.7, 126.6, 125.2, 123.9, 123.8, 123.2, 122.9, 118.7, 111.7, 47.2, 39.7, 26.5, 21.3; HRMS (ESI,  $m/z$ ): calcd. for  $\text{C}_{25}\text{H}_{20}\text{N}_2\text{O}_6\text{SH}^+$  477.1115, found 477.1115.  $[\alpha]_D^{27} = -74.4$  ( $c = 0.25$  in  $\text{CH}_2\text{Cl}_2$ ); HPLC analysis: 96% ee, [CHIRALPAK IB column; 1 mL/min; solvent system: *i*-PrOH/hexane = 10:90; retention times: 23.2 min (major), 26.4 min (minor)].

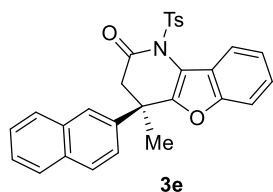

**(R)-4-Methyl-4-(naphthalen-2-yl)-1-tosyl-3,4-dihydrobenzofuro[3,2-b]pyridin-2(1H)-one (3e):** 46.7 mg, 97% yield; yellow solid, 151-153 °C.  $^1\text{H}$  NMR (400 MHz,  $\text{CDCl}_3$ )  $\delta$  8.08-8.06 (m, 1H), 7.80 (d,  $J = 7.6$  Hz, 1H), 7.67 (d,  $J = 8.4$  Hz, 1H), 7.62-7.60 (m, 1H), 7.55-7.44 (m, 3H), 7.42-7.35 (m, 3H), 7.33-7.30 (m, 1H), 7.16 (d,  $J = 8.4$  Hz, 2H), 6.24 (d,  $J = 8.0$  Hz, 2H), 3.39 (d,  $J = 16.0$  Hz, 1H), 2.95 (d,  $J = 16.0$  Hz, 1H), 1.86 (s, 3H), 1.70 (s, 3H);  $^{13}\text{C}$  NMR (100 MHz,  $\text{CDCl}_3$ )  $\delta$  169.3, 154.3, 151.1, 144.4, 141.2, 134.3, 133.2, 132.4, 128.7, 128.3, 128.2, 128.1, 127.4, 126.4, 126.2, 124.7, 124.2, 123.6, 123.4, 122.7, 118.4, 111.6, 47.1, 39.7, 26.9, 21.2; HRMS (ESI,  $m/z$ ): calcd. for  $\text{C}_{29}\text{H}_{23}\text{NO}_4\text{SH}^+$  482.1421, found 482.1424.  $[\alpha]_D^{27} = -16.8$  ( $c = 0.25$  in  $\text{CH}_2\text{Cl}_2$ ); HPLC analysis: 98% ee, [CHIRALPAK IA column; 1 mL/min; solvent system: *i*-PrOH/hexane = 20:80; retention times: 8.8 min (minor), 11.7 min (major)].

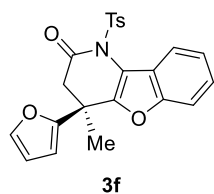

**(R)-4-(Furan-2-yl)-4-methyl-1-tosyl-3,4-dihydrobenzofuro[3,2-b]pyridin-2(1H)-one (3f):** 33.3 mg, 79% yield; yellow solid, 163-165 °C.  $^1\text{H}$  NMR (400 MHz,  $\text{CDCl}_3$ )  $\delta$  8.11-8.09 (m, 1H), 7.78 (d,  $J = 8.0$  Hz, 2H), 7.50-7.48 (m, 1H), 7.35-7.33 (m, 2H), 7.23 (d,  $J = 8.0$  Hz, 2H), 7.09 (s, 1H), 6.08 (d,  $J = 1.6$  Hz, 1H), 5.83 (d,  $J = 3.2$  Hz, 1H), 3.02 (d,  $J = 16.0$  Hz, 1H), 2.82 (d,  $J = 15.6$  Hz, 1H), 2.43 (s, 3H), 1.66 (s, 3H);  $^{13}\text{C}$  NMR (100 MHz,  $\text{CDCl}_3$ )  $\delta$  168.9, 154.5, 154.0, 147.4, 144.9, 142.2, 135.0, 129.4, 129.1, 124.8, 123.4, 123.0, 122.8, 118.3, 111.6, 110.1, 105.4, 47.2, 35.6, 22.8, 21.6; HRMS (ESI,  $m/z$ ): calcd. for  $\text{C}_{23}\text{H}_{19}\text{NO}_5\text{SH}^+$  422.1057, found 422.1060.  $[\alpha]_D^{27} = -137.2$  ( $c = 0.25$  in  $\text{CH}_2\text{Cl}_2$ ); HPLC analysis: 97% ee, [CHIRALPAK IA column; 1 mL/min; solvent system: *i*-PrOH/hexane = 20:80; retention times: 8.8 min (minor), 12.6 min (major)].

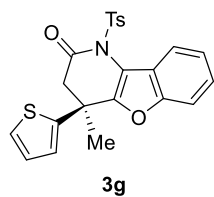

**(S)-4-Methyl-4-(thiophen-2-yl)-1-tosyl-3,4-dihydrobenzofuro[3,2-b]pyridin-2(1H)-one (3g):** 38.1 mg, 87% yield; white solid, 160-162 °C.  $^1\text{H}$  NMR (400 MHz,  $\text{CDCl}_3$ )  $\delta$  8.10-8.08 (m, 1H), 7.60 (d,  $J = 8.4$  Hz, 2H), 7.54-7.52 (m, 1H), 7.39-7.33 (m, 2H), 7.12-7.07 (m, 3H), 6.67 (t,  $J = 3.6$  Hz, 1H), 6.56 (d,  $J = 3.6$  Hz, 1H), 3.11 (d,  $J = 15.6$  Hz, 1H), 2.93 (d,  $J = 16.0$  Hz, 1H), 2.38 (s, 3H), 1.73 (s, 3H);  $^{13}\text{C}$  NMR (100 MHz,  $\text{CDCl}_3$ )  $\delta$  168.8, 154.0, 149.2, 147.6, 144.7, 134.8, 129.0, 128.9, 126.7, 124.9, 124.6, 123.6, 123.5, 123.1, 122.8, 118.1, 111.7, 49.4, 37.3, 27.6, 21.6; HRMS (ESI,

m/z): calcd. for  $C_{23}H_{19}NO_4S_2H^+$  438.0828, found 438.0832.  $[\alpha]_D^{27} = -82.0$  ( $c = 0.25$  in  $CH_2Cl_2$ ); HPLC analysis: 99% ee, [CHIRALPAK IA column; 1 mL/min; solvent system: *i*-PrOH/hexane = 20:80; retention times: 9.4 min (minor), 13.9 min (major)].

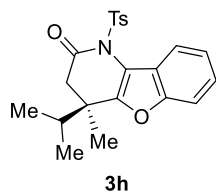

**(R)-4-Isopropyl-4-methyl-1-tosyl-3,4-dihydrobenzofuro[3,2-b]pyridin-2(1H)-one (3h):** 39.3 mg, 99% yield; yellow solid, 155-157 °C.  $^1H$  NMR (400 MHz,  $CDCl_3$ )  $\delta$  8.07-8.05 (m, 1H), 7.90 (d,  $J = 8.0$  Hz, 2H), 7.47-7.44 (m, 1H), 7.33-7.30 (m, 4H), 2.66 (d,  $J = 15.6$  Hz, 1H), 2.49 (d,  $J = 15.6$  Hz, 1H), 2.44 (s, 3H), 1.29-1.22 (m, 1H), 1.18 (s, 3H), 0.80 (d,  $J = 6.8$  Hz, 3H), 0.73 (d,  $J = 6.4$  Hz, 3H);  $^{13}C$  NMR (100 MHz,  $CDCl_3$ )  $\delta$  170.6, 154.1, 152.5, 145.3, 134.7, 129.2, 129.1, 124.3, 123.3, 123.2, 122.4, 117.3, 111.4, 46.6, 38.5, 34.5, 21.6, 18.4, 17.1, 16.5; HRMS (ESI, m/z): calcd. for  $C_{22}H_{23}NO_4SH^+$  398.1421, found 398.1422.  $[\alpha]_D^{27} = -142.8$  ( $c = 0.25$  in  $CH_2Cl_2$ ); HPLC analysis: 97% ee, [CHIRALPAK IA column; 1 mL/min; solvent system: *i*-PrOH/hexane = 20:80; retention times: 6.5 min (minor), 7.8 min (major)].

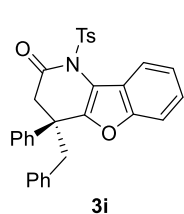

**(R)-4-Benzyl-4-phenyl-1-tosyl-3,4-dihydrobenzofuro[3,2-b]pyridin-2(1H)-one (3i):** 42.3 mg, 83% yield; yellow solid, 146-148 °C.  $^1H$  NMR (400 MHz,  $CDCl_3$ )  $\delta$  8.07 (d,  $J = 7.6$  Hz, 1H), 7.63 (d,  $J = 7.6$  Hz, 1H), 7.41-7.34 (m, 2H), 7.27 (t,  $J = 8.0$  Hz, 2H), 7.19-7.00 (m, 6H), 6.89 (d,  $J = 7.6$  Hz, 2H), 6.81 (d,  $J = 8.0$  Hz, 2H), 6.64 (d,  $J = 7.2$  Hz, 2H), 3.38 (d,  $J = 13.6$  Hz, 1H), 3.28 (d,  $J = 13.2$  Hz, 1H), 3.02 (d,  $J = 15.6$  Hz, 1H), 2.83 (d,  $J = 15.6$  Hz, 1H), 2.28 (s, 3H);  $^{13}C$  NMR (100 MHz,  $CDCl_3$ )  $\delta$  169.5, 154.0, 150.8, 144.2, 141.7, 134.7, 134.4, 130.4, 128.8, 128.4, 128.3, 127.9, 127.0, 126.9, 126.5, 124.7, 123.5, 123.4, 122.8, 118.1, 111.5, 45.5, 43.9, 43.5, 21.5; HRMS (ESI, m/z): calcd. for  $C_{31}H_{25}NO_4SH^+$  508.1577, found 508.1583.  $[\alpha]_D^{27} = +32.8$  ( $c = 0.25$  in  $CH_2Cl_2$ ); HPLC analysis: 94% ee, [CHIRALPAK IA column; 1 mL/min; solvent system: *i*-PrOH/hexane = 20:80; retention times: 11.5 min (minor), 15.6 min (major)].

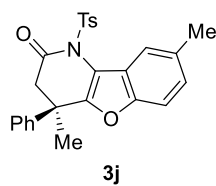

**(R)-4,8-Dimethyl-4-phenyl-1-tosyl-3,4-dihydrobenzofuro[3,2-b]pyridin-2(1H)-one (3j):** 40.1 mg, 90% yield; orange solid, 120-122 °C.  $^1H$  NMR (400 MHz,  $CDCl_3$ )  $\delta$  7.85 (s, 1H), 7.43 (d,  $J = 8.4$  Hz, 1H), 7.37 (d,  $J = 8.4$  Hz, 2H), 7.18 (d,  $J = 8.0$  Hz, 2H), 7.12-7.06 (m, 4H), 6.89 (d,  $J = 8.0$  Hz, 2H), 3.22 (d,  $J = 15.6$  Hz, 1H), 2.85 (d,  $J = 16.0$  Hz, 1H), 2.50 (s, 3H), 2.31 (s, 3H), 1.61 (s, 3H);  $^{13}C$  NMR (100 MHz,  $CDCl_3$ )  $\delta$  169.4, 152.6, 151.1, 144.3, 143.7, 134.5, 133.1, 128.9, 128.8, 128.5, 126.8, 126.0, 125.4, 123.4, 122.2, 117.7, 111.1, 47.3, 39.5, 27.3, 21.5; HRMS (ESI, m/z): calcd. for  $C_{26}H_{23}NO_4SH^+$  446.1421, found 446.1422.  $[\alpha]_D^{27} = -66.4$  ( $c = 0.25$  in  $CH_2Cl_2$ ); HPLC analysis: 96% ee, [CHIRALPAK IA column; 1 mL/min; solvent system: *i*-PrOH/hexane = 20:80; retention times: 6.2 min (minor), 8.9 min (major)].

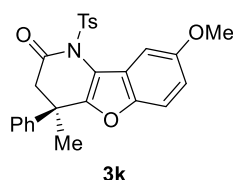

**(R)-8-Methoxy-4-methyl-4-phenyl-1-tosyl-3,4-dihydrobenzofuro[3,2-b]pyridin-2(1H)-one (3k):** 33.2 mg, 72% yield; yellow



solid, 166-168 °C. <sup>1</sup>H NMR (400 MHz, CDCl<sub>3</sub>) δ 7.51 (d, *J* = 2.4 Hz, 1H), 7.43 (d, *J* = 8.8 Hz, 1H), 7.38 (d, *J* = 8.0 Hz, 2H), 7.19-7.15 (m, 1H), 7.12-7.05 (m, 4H), 6.99-6.96 (m, 1H), 6.89 (d, *J* = 8.0 Hz, 2H), 3.89 (s, 3H), 3.23 (d, *J* = 16.0 Hz, 1H), 2.86 (d, *J* = 15.6 Hz, 1H), 2.32 (s, 3H), 1.61 (s, 3H); <sup>13</sup>C NMR (100 MHz, CDCl<sub>3</sub>) δ 169.3, 156.3, 151.8, 149.1, 144.4, 143.6, 134.5, 128.9, 128.8, 128.5, 126.8, 125.4, 123.9, 118.1, 114.2, 112.0, 104.6, 56.0, 47.3, 39.6, 27.3, 21.5; HRMS (ESI, *m/z*): calcd. for C<sub>26</sub>H<sub>23</sub>NO<sub>5</sub>SH<sup>+</sup> 462.1370, found 462.1373. [α]<sup>27</sup><sub>D</sub> = -85.2 (*c* = 0.25 in CH<sub>2</sub>Cl<sub>2</sub>); HPLC analysis: 98% ee, [CHIRALPAK IA column; 1 mL/min; solvent system: *i*-PrOH/hexane = 20:80; retention times: 7.3 min (minor), 12.8 min (major)].

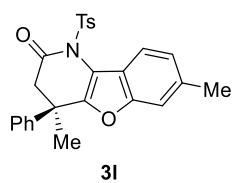

**(R)-4,7-Dimethyl-4-phenyl-1-tosyl-3,4-dihydrobenzofuro[3,2-b]pyridin-2(1H)-one (3l):** 37.4 mg, 84% yield; yellow solid, 147-149 °C. <sup>1</sup>H NMR (400 MHz, CDCl<sub>3</sub>) δ 7.93 (d, *J* = 8.4 Hz, 1H), 7.38 (t, *J* = 8.4 Hz, 2H), 7.19-7.14 (m, 2H), 7.11-7.06 (m, 4H), 6.89 (d, *J* = 8.0 Hz, 2H), 3.21 (d, *J* = 15.6 Hz, 1H), 2.86 (d, *J* = 15.6 Hz, 1H), 2.51 (s, 3H), 2.31 (s, 3H), 1.62 (s, 3H); <sup>13</sup>C NMR (100 MHz, CDCl<sub>3</sub>) δ 169.4, 154.5, 150.2, 144.3, 143.7, 135.1, 134.6, 128.9, 128.7, 128.5, 126.8, 125.4, 124.9, 122.1, 120.9, 117.9, 111.7, 47.4, 39.5, 27.2, 21.5; HRMS (ESI, *m/z*): calcd. for C<sub>26</sub>H<sub>23</sub>NO<sub>4</sub>SH<sup>+</sup> 446.1421, found 446.1426. [α]<sup>24</sup><sub>D</sub> = -89.0 (*c* = 0.3 in CH<sub>2</sub>Cl<sub>2</sub>); HPLC analysis: 97% ee, [CHIRALPAK ADH column; 1 mL/min; solvent system: *i*-PrOH/hexane = 10:90; retention times: 15.5 min (minor), 37.0 min (major)].

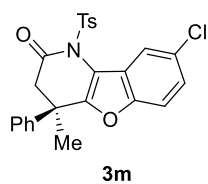

**(R)-8-Chloro-4-methyl-4-phenyl-1-tosyl-3,4-dihydrobenzofuro[3,2-b]pyridin-2(1H)-one (3m):** 35.9 mg, 77% yield; yellow solid, 166-168 °C. <sup>1</sup>H NMR (400 MHz, CDCl<sub>3</sub>) δ 8.06 (d, *J* = 2.4 Hz, 1H), 7.47 (d, *J* = 8.8 Hz, 1H), 7.37 (d, *J* = 8.4 Hz, 2H), 7.33-7.30 (m, 1H), 7.20-7.16 (m, 1H), 7.11 (t, *J* = 8.0 Hz, 2H), 7.05 (d, *J* = 7.6 Hz, 2H), 6.90 (d, *J* = 8.0 Hz, 2H), 3.24 (d, *J* = 15.6 Hz, 1H), 2.87 (d, *J* = 15.6 Hz, 1H), 2.32 (s, 3H), 1.63 (s, 3H); <sup>13</sup>C NMR (100 MHz, CDCl<sub>3</sub>) δ 169.0, 152.5, 152.4, 144.6, 143.2, 134.3, 129.3, 128.9, 128.8, 128.5, 127.0, 125.3, 125.0, 124.6, 122.3, 117.6, 112.5, 47.1, 39.6, 27.1, 21.6; HRMS (ESI, *m/z*): calcd. for C<sub>25</sub>H<sub>20</sub>ClNO<sub>4</sub>SH<sup>+</sup> 466.0874, found 466.0876. [α]<sup>27</sup><sub>D</sub> = -89.6 (*c* = 0.25 in CH<sub>2</sub>Cl<sub>2</sub>); HPLC analysis: 98% ee, [CHIRALPAK IA column; 1 mL/min; solvent system: *i*-PrOH/hexane = 20:80; retention times: 6.7 min (minor), 11.9 min (major)].

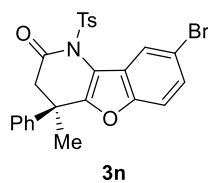

**(R)-8-Bromo-4-methyl-4-phenyl-1-tosyl-3,4-dihydrobenzofuro[3,2-b]pyridin-2(1H)-one (3n):** 35.2 mg, 69% yield; yellow solid, 132-134 °C. <sup>1</sup>H NMR (400 MHz, CDCl<sub>3</sub>) δ 8.22 (d, *J* = 1.6 Hz, 1H), 7.48-7.41 (m, 2H), 7.37 (d, *J* = 8.4 Hz, 2H), 7.20-7.16 (m, 1H), 7.11 (t, *J* = 8.9 Hz, 2H), 7.06-7.04 (m, 2H), 6.90 (d, *J* = 8.4 Hz, 2H), 3.23 (d, *J* = 16.0 Hz, 1H), 2.87 (d, *J* = 16.0 Hz, 1H), 2.32 (s, 3H), 1.63 (s, 3H); <sup>13</sup>C NMR (100 MHz, CDCl<sub>3</sub>) δ 168.9, 152.9, 152.3, 144.6, 143.2, 134.3, 128.9, 128.8, 128.5, 127.7, 127.0, 125.3, 125.1, 117.4, 116.8, 113.0, 47.1, 39.6, 27.1, 21.6; HRMS (ESI, *m/z*): calcd. for C<sub>25</sub>H<sub>20</sub>BrNO<sub>4</sub>SH<sup>+</sup> 510.0369, found 510.0372. [α]<sup>27</sup><sub>D</sub> = -100.0 (*c*

= 0.25 in CH<sub>2</sub>Cl<sub>2</sub>); HPLC analysis: 98% ee, [CHIRALPAK IA column; 1 mL/min; solvent system: *i*-PrOH/hexane = 20:80; retention times: 7.0 min (minor), 12.0 min (major)].

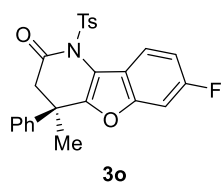

**(R)-7-Fluoro-4-methyl-4-phenyl-1-tosyl-3,4-dihydrobenzofuro[3,2-b]pyridin-2(1H)-one (3o):** 38.3 mg, 85% yield; white solid, 139-141 °C. <sup>1</sup>H NMR (400 MHz, CDCl<sub>3</sub>) δ 8.03-7.99 (m, 1H), 7.38 (d, *J* = 8.0 Hz, 2H), 7.29-7.26 (m, 1H), 7.20-7.06 (m, 6H), 6.90 (d, *J* = 8.0 Hz, 2H), 3.23 (d, *J* = 16.0 Hz, 1H), 2.87 (d, *J* = 15.6 Hz, 1H), 2.32 (s, 3H), 1.63 (s, 3H); <sup>13</sup>C NMR (100 MHz, CDCl<sub>3</sub>) δ 169.1, 160.8 (d, *J*<sub>C-F</sub> = 242.8 Hz), 154.0 (d, *J*<sub>C-F</sub> = 13.2 Hz), 151.5, 144.5, 143.4, 134.4, 128.9, 128.8, 128.5, 126.9, 125.3, 123.3 (d, *J*<sub>C-F</sub> = 9.6 Hz), 119.8, 117.9, 111.9 (d, *J*<sub>C-F</sub> = 23.5 Hz), 99.2 (d, *J*<sub>C-F</sub> = 26.5 Hz), 47.3, 39.6, 27.2, 21.6; HRMS (ESI, *m/z*): calcd. for C<sub>25</sub>H<sub>20</sub>FNO<sub>4</sub>SH<sup>+</sup> 450.1170, found 450.1171. [α]<sub>D</sub><sup>27</sup> = -45.2 (*c* = 0.25 in CH<sub>2</sub>Cl<sub>2</sub>); HPLC analysis: 96% ee, [CHIRALPAK IA column; 1 mL/min; solvent system: *i*-PrOH/hexane = 20:80; retention times: 7.2 min (minor), 11.0 min (major)].

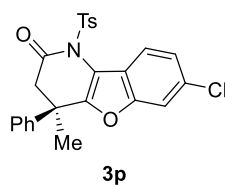

**(R)-7-Chloro-4-methyl-4-phenyl-1-tosyl-3,4-dihydrobenzofuro[3,2-b]pyridin-2(1H)-one (3p):** 41.5 mg, 89% yield; yellow solid, 130-132 °C. <sup>1</sup>H NMR (400 MHz, CDCl<sub>3</sub>) δ 7.98 (d, *J* = 8.8 Hz, 1H), 7.57 (d, *J* = 1.6 Hz, 1H), 7.37 (d, *J* = 8.0 Hz, 2H), 7.34-7.32 (m, 1H), 7.20-7.16 (m, 1H), 7.11 (t, *J* = 7.6 Hz, 2H), 7.06-7.04 (m, 2H), 6.90 (d, *J* = 8.0 Hz, 2H), 3.23 (d, *J* = 16.0 Hz, 1H), 2.87 (d, *J* = 16.0 Hz, 1H), 2.32 (s, 3H), 1.62 (s, 3H); <sup>13</sup>C NMR (100 MHz, CDCl<sub>3</sub>) δ 169.0, 154.1, 151.6, 144.6, 143.3, 134.3, 130.6, 128.9, 128.8, 128.5, 127.0, 125.3, 124.2, 123.4, 122.1, 117.9, 112.1, 47.2, 39.6, 27.1, 21.5; HRMS (ESI, *m/z*): calcd. for C<sub>25</sub>H<sub>20</sub>ClNO<sub>4</sub>SH<sup>+</sup> 466.0874, found 466.0871. [α]<sub>D</sub><sup>27</sup> = -32.4 (*c* = 0.25 in CH<sub>2</sub>Cl<sub>2</sub>); HPLC analysis: 98% ee, [CHIRALPAK IA column; 1 mL/min; solvent system: *i*-PrOH/hexane = 20:80; retention times: 7.9 min (minor), 13.7 min (major)].

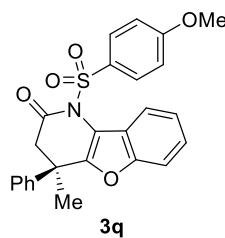

**(R)-1-((4-Methoxyphenyl)sulfonyl)-4-methyl-4-phenyl-3,4-dihydrobenzofuro[3,2-b]pyridin-2(1H)-one (3q):** 41.6 mg, 93% yield; brown solid, 128-130 °C. <sup>1</sup>H NMR (400 MHz, CDCl<sub>3</sub>) δ 8.08-8.05 (m, 1H), 7.57-7.55 (m, 1H), 7.45 (d, *J* = 8.8 Hz, 2H), 7.39-7.34 (m, 2H), 7.18-7.09 (m, 5H), 6.56 (d, *J* = 8.8 Hz, 2H), 3.81 (s, 3H), 3.24 (d, *J* = 16.0 Hz, 1H), 2.88 (d, *J* = 15.6 Hz, 1H), 1.64 (s, 3H); <sup>13</sup>C NMR (100 MHz, CDCl<sub>3</sub>) δ 169.3, 163.4, 154.2, 150.9, 143.7, 130.9, 129.0, 128.9, 128.8, 127.1, 125.4, 124.6, 123.5, 122.6, 118.1, 113.4, 111.6, 55.5, 47.4, 39.5, 27.2; HRMS (ESI, *m/z*): calcd. for C<sub>25</sub>H<sub>21</sub>NO<sub>5</sub>SH<sup>+</sup> 448.1213, found 448.1217. [α]<sub>D</sub><sup>27</sup> = -59.2 (*c* = 0.25 in CH<sub>2</sub>Cl<sub>2</sub>); HPLC analysis: 98% ee, [CHIRALPAK IA column; 1 mL/min; solvent system: *i*-PrOH/hexane = 20:80; retention times: 11.0 min (minor), 20.7 min (major)].

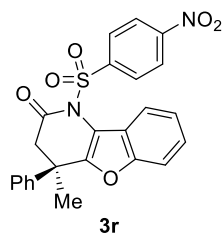

**(R)-4-Methyl-1-((4-nitrophenyl)sulfonyl)-4-phenyl-3,4-dihydrobenzofuro[3,2-b]pyridin-2(1H)-one (3r):** 43.4 mg, 94% yield; yellow solid, 176-178 °C. <sup>1</sup>H NMR (400 MHz, CDCl<sub>3</sub>) δ 8.03 (d, *J* = 7.6 Hz, 1H), 7.87 (d, *J* = 8.0 Hz, 2H), 7.61 (t, *J* = 7.6 Hz, 3H), 7.44-7.37 (m, 2H), 7.20-7.17 (m, 1H), 7.10-7.04 (m, 4H), 3.29 (d, *J* = 15.6 Hz, 1H), 2.91 (d, *J* = 15.6 Hz, 1H), 1.64 (s, 3H); <sup>13</sup>C NMR (100 MHz, CDCl<sub>3</sub>) δ 169.5, 154.2, 151.7, 150.1, 143.7, 142.5, 129.7, 128.9, 127.4, 125.3, 125.1, 123.8, 123.3, 123.1, 122.4, 117.5, 111.8, 46.6, 39.8, 27.4; HRMS (ESI, *m/z*): calcd. for C<sub>24</sub>H<sub>18</sub>N<sub>2</sub>O<sub>6</sub>SH<sup>+</sup> 463.0958, found 463.0977. [α]<sub>D</sub><sup>27</sup> = -54.4 (*c* = 0.25 in CH<sub>2</sub>Cl<sub>2</sub>); HPLC analysis: 98% ee, [CHIRALPAK IA column; 1 mL/min; solvent system: *i*-PrOH/hexane = 20:80; retention times: 10.5 min (minor), 17.7 min (major)].

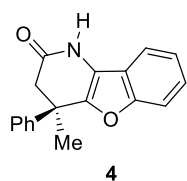

**(R)-4-Methyl-4-phenyl-3,4-dihydrobenzofuro[3,2-b]pyridin-2(1H)-one (4):** 23.1 mg, 83% yield; white solid, 142-144 °C. <sup>1</sup>H NMR (400 MHz, CDCl<sub>3</sub>) δ 9.50 (br, 1H), 7.59-7.57 (m, 1H), 7.47-7.45 (m, 1H), 7.32-7.27 (m, 6H), 7.22-7.17 (m, 1H), 3.24 (d, *J* = 16.4 Hz, 1H), 3.02 (d, *J* = 16.0 Hz, 1H), 1.84 (s, 3H); <sup>13</sup>C NMR (100 MHz, CDCl<sub>3</sub>) δ 170.4, 154.0, 143.9, 143.8, 128.8, 127.1, 125.6, 124.4, 123.0, 120.7, 118.0, 117.8, 111.9, 47.5, 40.4, 26.2; HRMS (ESI, *m/z*): calcd. for C<sub>18</sub>H<sub>15</sub>NO<sub>2</sub>H<sup>+</sup> 278.1176, found 278.1179. [α]<sub>D</sub><sup>27</sup> = +12.4 (*c* = 0.25 in CH<sub>2</sub>Cl<sub>2</sub>); HPLC analysis: 98% ee, [CHIRALPAK IA column; 1 mL/min; solvent system: *i*-PrOH/hexane = 20:80; retention times: 6.8 min (major), 10.6 min (minor)].

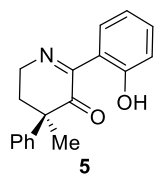

**(R)-2-(2-Hydroxyphenyl)-4-methyl-4-phenyl-5,6-dihydropyridin-3(4H)-one (5):** 19.9 mg, 71% yield; yellow solid, 98-100 °C. <sup>1</sup>H NMR (400 MHz, CDCl<sub>3</sub>) δ 13.74 (br, 1H), 8.00 (d, *J* = 8.0 Hz, 1H), 7.36-7.27 (m, 4H), 7.19 (d, *J* = 7.2 Hz, 2H), 6.93 (d, *J* = 8.4 Hz, 1H), 6.88 (t, *J* = 8.0 Hz, 1H), 4.10-4.03 (m, 1H), 3.88-3.79 (m, 1H), 2.83-2.78 (m, 1H), 2.47-2.39 (m, 1H), 1.44 (s, 3H); <sup>13</sup>C NMR (100 MHz, CDCl<sub>3</sub>) δ 198.5, 165.5, 162.0, 139.6, 132.6, 130.0, 129.3, 127.7, 125.7, 118.2, 117.9, 115.8, 50.4, 45.4, 37.0, 26.4; HRMS (ESI, *m/z*): calcd. for C<sub>18</sub>H<sub>17</sub>NO<sub>2</sub>H<sup>+</sup> 280.1332, found 280.1343. [α]<sub>D</sub><sup>27</sup> = +102.8 (*c* = 0.25 in CH<sub>2</sub>Cl<sub>2</sub>); HPLC analysis: 98% ee, [CHIRALPAK IA column; 1 mL/min; solvent system: *i*-PrOH/hexane = 10:90; retention times: 6.3 min (major), 7.3 min (minor)].

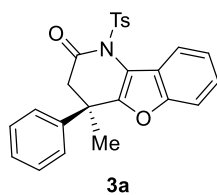

CDCl<sub>3</sub>, <sup>1</sup>H NMR, 400 MHz

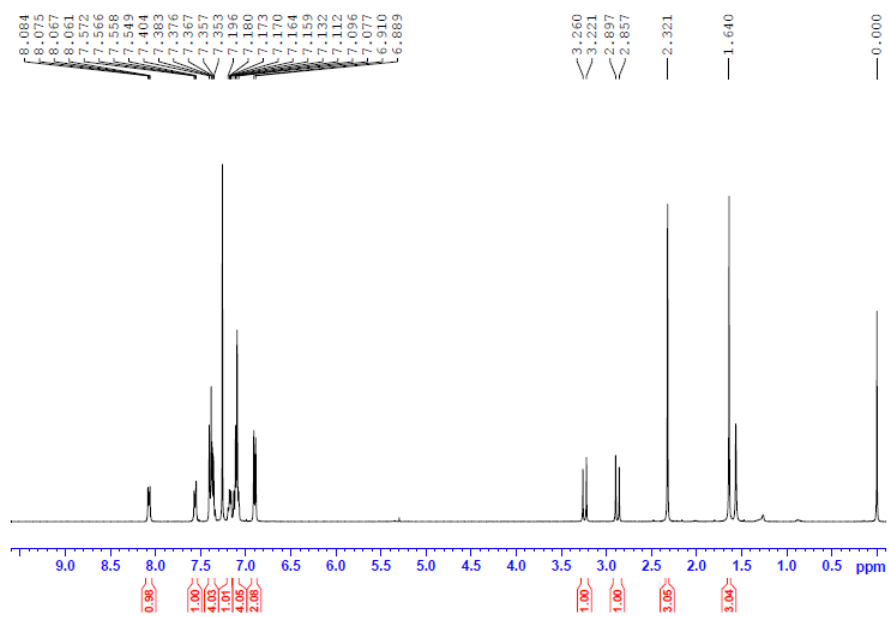

CDCl<sub>3</sub>, <sup>13</sup>C NMR, 100 MHz

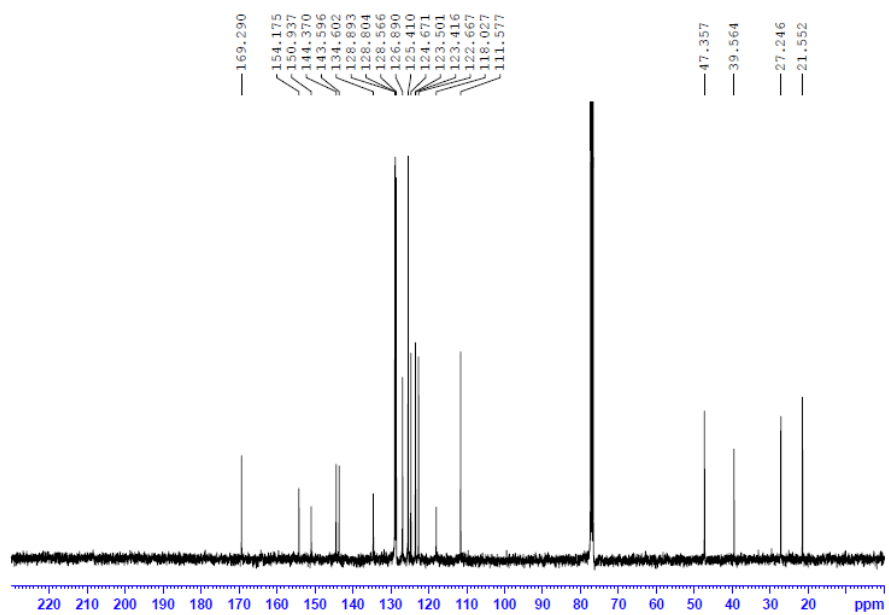

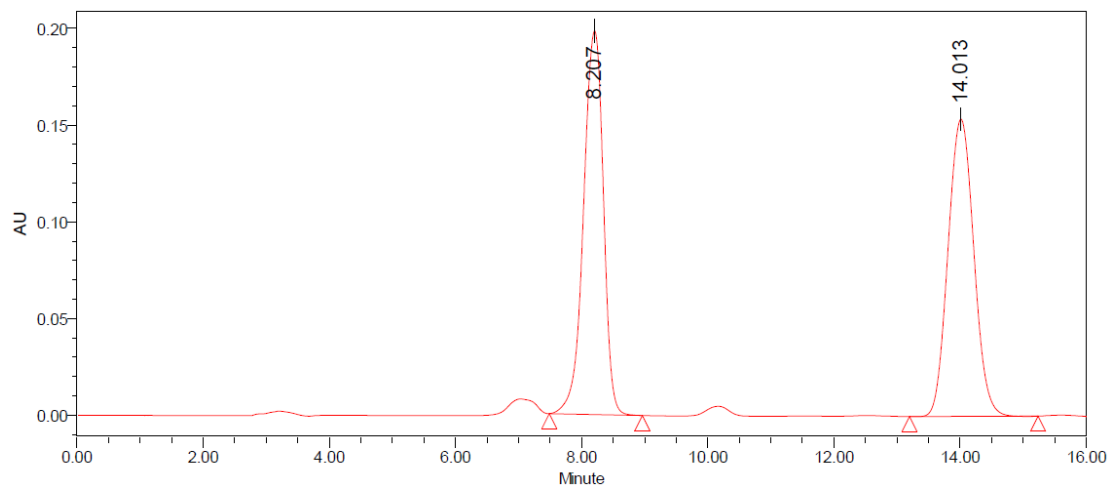

|   | RT<br>(分钟) | Area<br>(微伏*秒) | % Area | Height<br>(微伏) | % Height | Start Time<br>(分钟) | End Time<br>(分钟) |
|---|------------|----------------|--------|----------------|----------|--------------------|------------------|
| 1 | 8.207      | 4335965        | 49.88  | 198353         | 56.35    | 7.487              | 8.963            |
| 2 | 14.013     | 4357420        | 50.12  | 153641         | 43.65    | 13.197             | 15.235           |

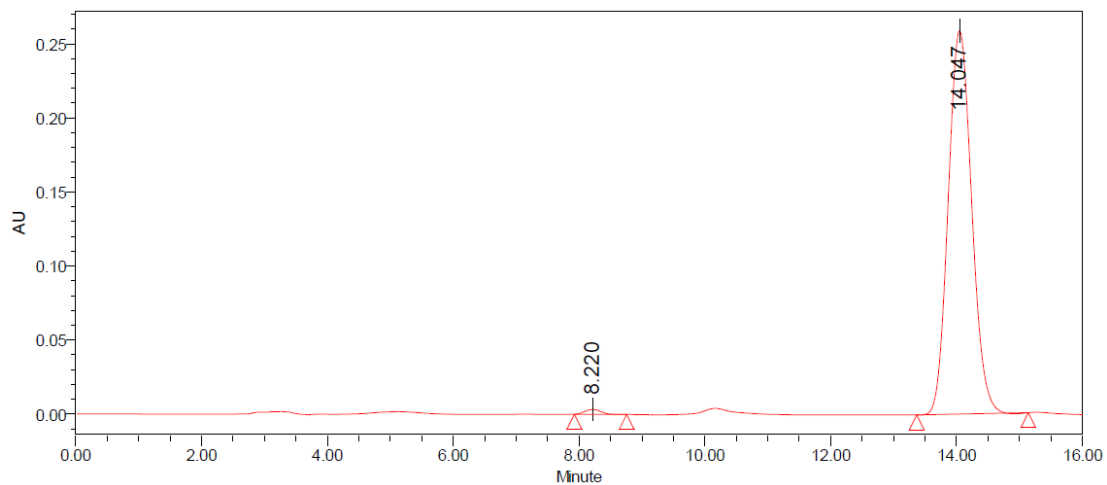

|   | RT<br>(分钟) | Area<br>(微伏*秒) | % Area | Height<br>(微伏) | % Height | Start Time<br>(分钟) | End Time<br>(分钟) |
|---|------------|----------------|--------|----------------|----------|--------------------|------------------|
| 1 | 8.220      | 58823          | 0.87   | 3236           | 1.23     | 7.925              | 8.757            |
| 2 | 14.047     | 6718781        | 99.13  | 259009         | 98.77    | 13.367             | 15.140           |

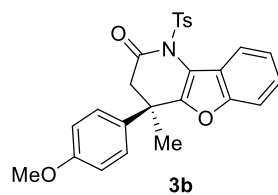

CDCl<sub>3</sub>, <sup>1</sup>H NMR, 400 MHz

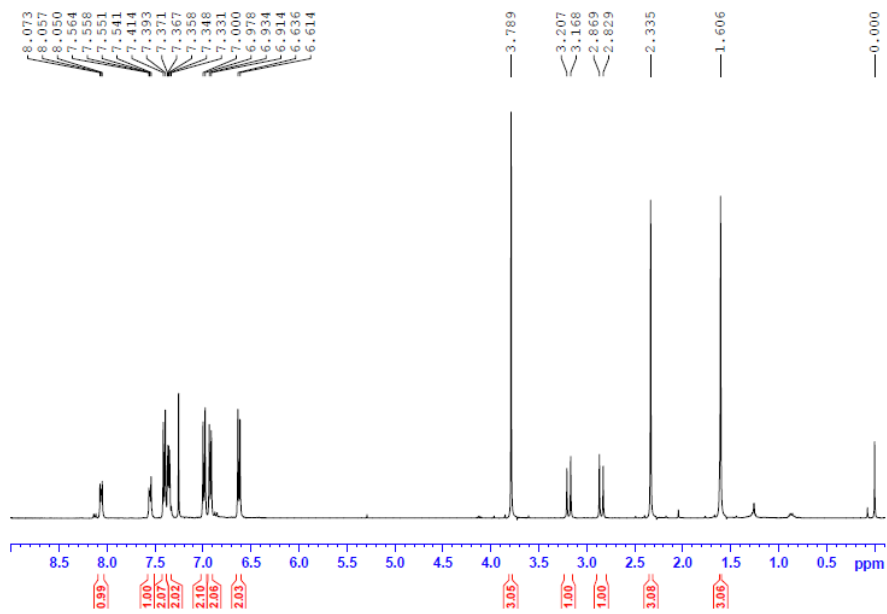

CDCl<sub>3</sub>, <sup>13</sup>C NMR, 100 MHz

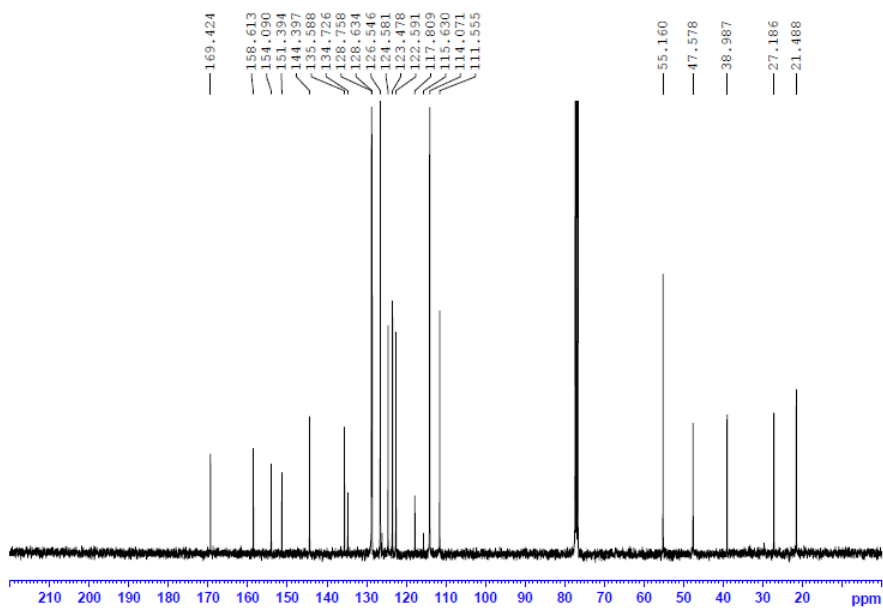

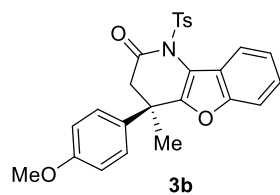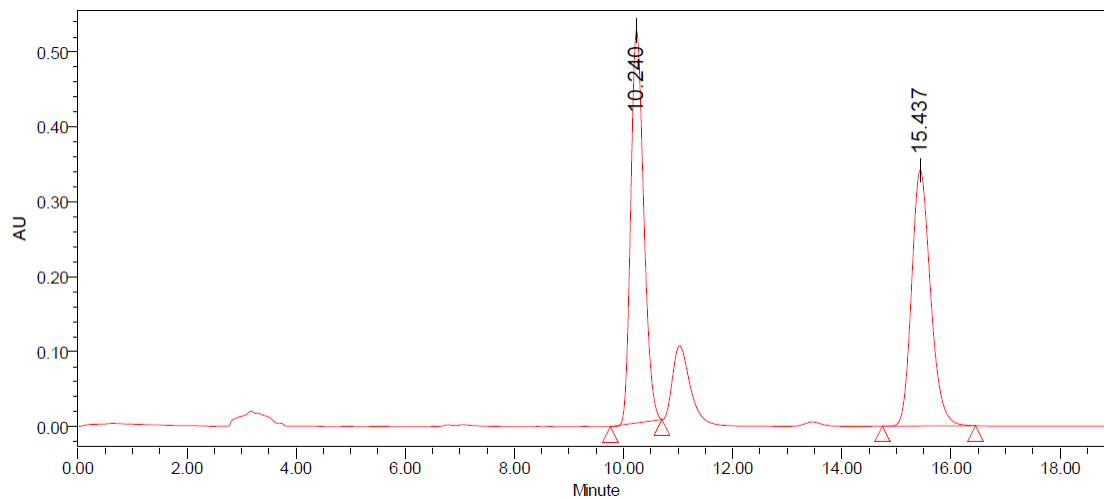

|   | RT<br>(分钟) | Area<br>(微伏*秒) | % Area | Height<br>(微伏) | % Height | Start Time<br>(分钟) | End Time<br>(分钟) |
|---|------------|----------------|--------|----------------|----------|--------------------|------------------|
| 1 | 10.240     | 8656287        | 51.36  | 523662         | 60.53    | 9.760              | 10.703           |
| 2 | 15.437     | 8198091        | 48.64  | 341504         | 39.47    | 14.745             | 16.450           |

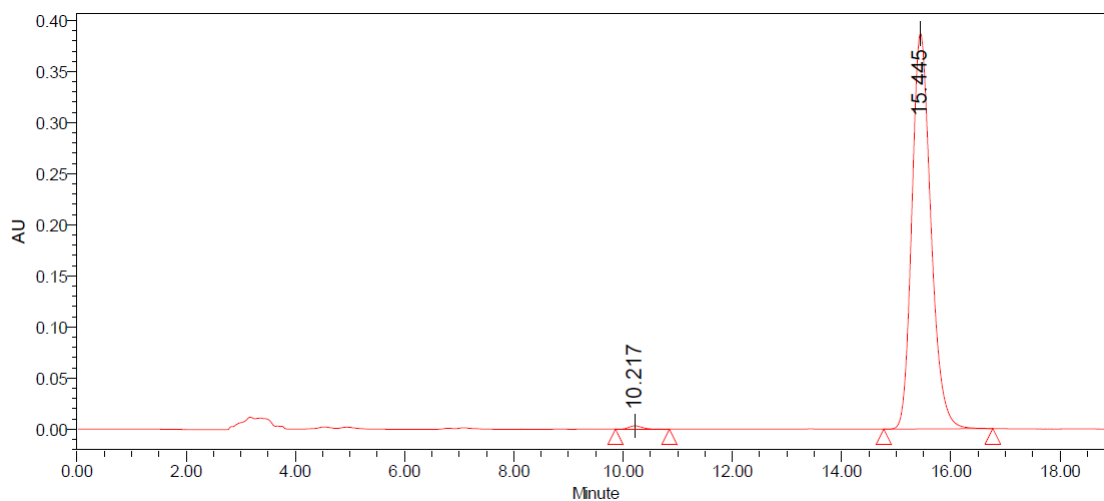

|   | RT<br>(分钟) | Area<br>(微伏*秒) | % Area | Height<br>(微伏) | % Height | Start Time<br>(分钟) | End Time<br>(分钟) |
|---|------------|----------------|--------|----------------|----------|--------------------|------------------|
| 1 | 10.217     | 55615          | 0.59   | 3290           | 0.84     | 9.862              | 10.847           |
| 2 | 15.445     | 9351079        | 99.41  | 387067         | 99.16    | 14.773             | 16.768           |

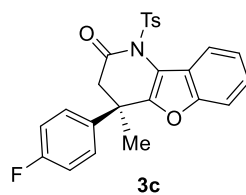

$\text{CDCl}_3$ ,  $^1\text{H}$  NMR, 400 MHz

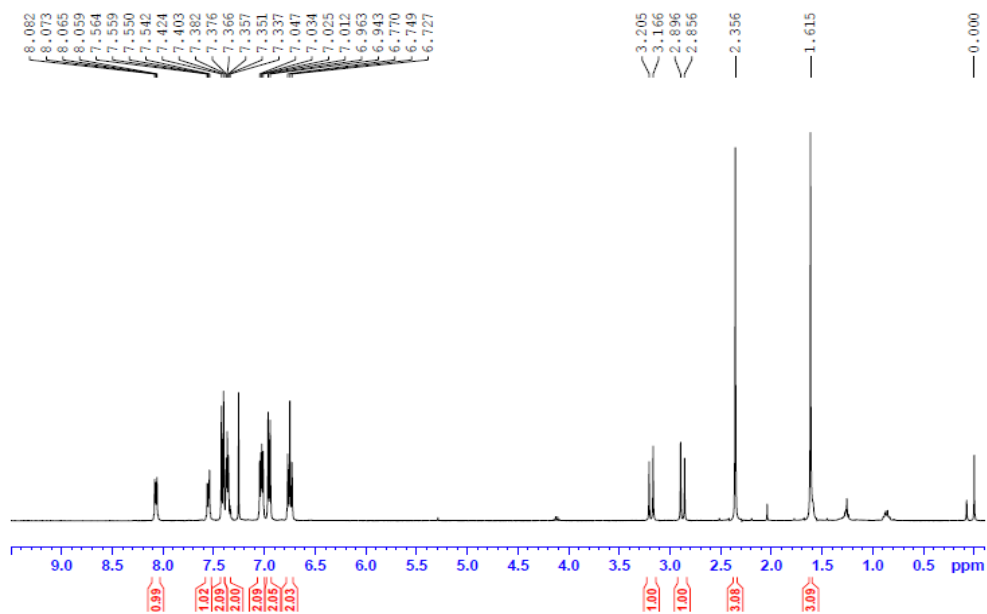

$\text{CDCl}_3$ ,  $^{13}\text{C}$  NMR, 100 MHz

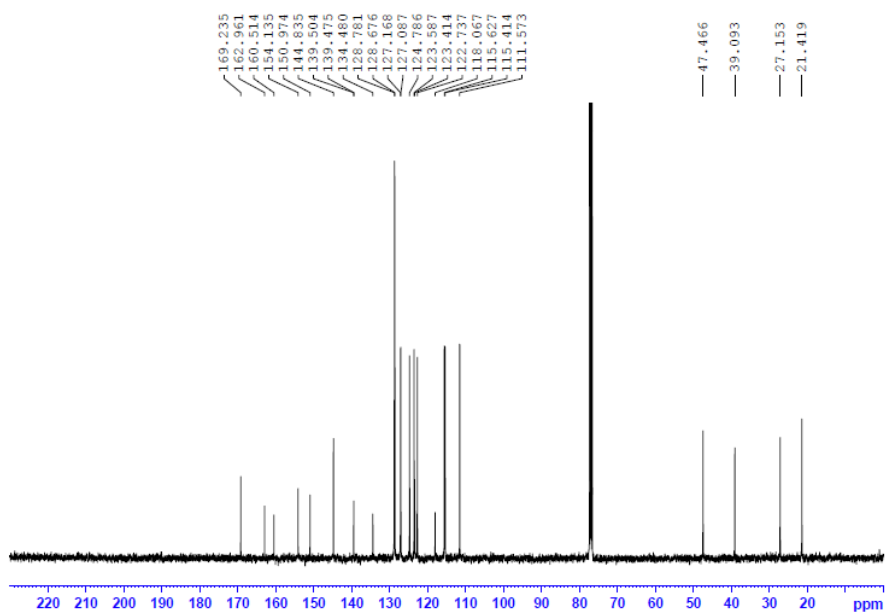



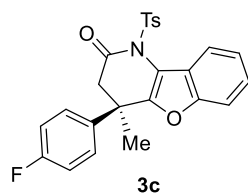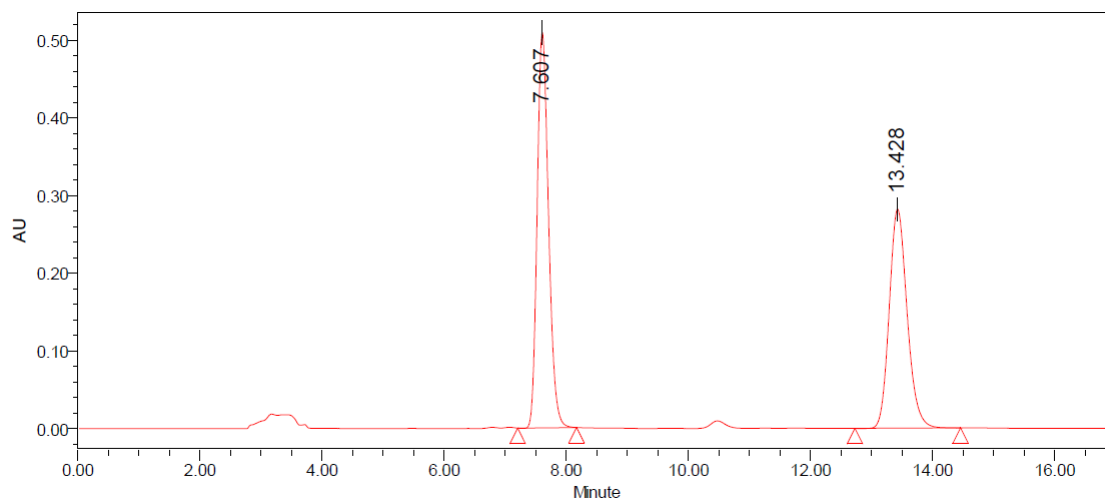

|   | RT<br>(分钟) | Area<br>(微伏*秒) | % Area | Height<br>(微伏) | % Height | Start Time<br>(分钟) | End Time<br>(分钟) |
|---|------------|----------------|--------|----------------|----------|--------------------|------------------|
| 1 | 7.607      | 6591532        | 53.46  | 508923         | 64.35    | 7.205              | 8.170            |
| 2 | 13.428     | 5738094        | 46.54  | 281985         | 35.65    | 12.730             | 14.458           |

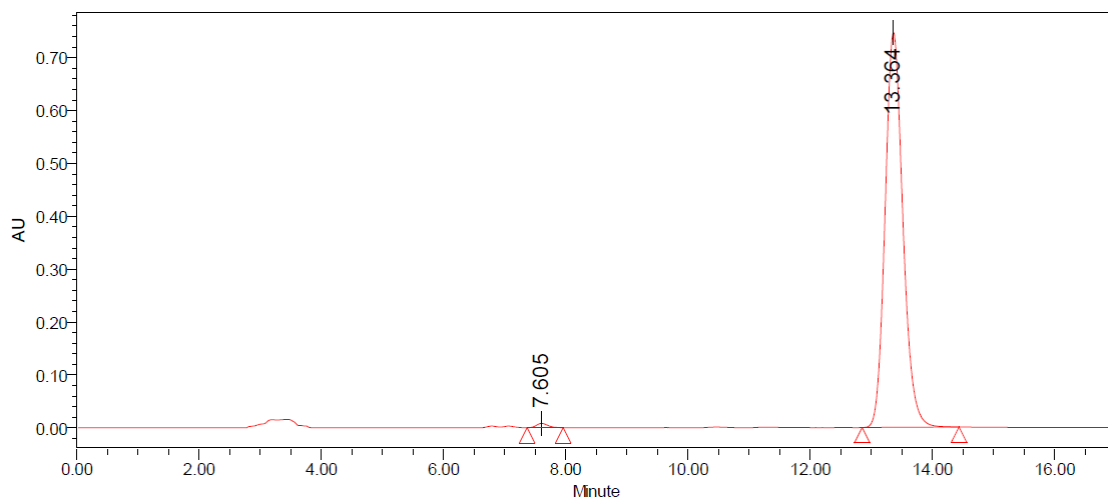

|   | RT<br>(分钟) | Area<br>(微伏*秒) | % Area | Height<br>(微伏) | % Height | Start Time<br>(分钟) | End Time<br>(分钟) |
|---|------------|----------------|--------|----------------|----------|--------------------|------------------|
| 1 | 7.605      | 100765         | 0.66   | 7909           | 1.05     | 7.368              | 7.958            |
| 2 | 13.364     | 15113659       | 99.34  | 746980         | 98.95    | 12.852             | 14.437           |

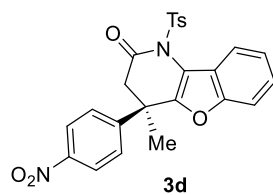

$\text{CDCl}_3$ ,  $^1\text{H}$  NMR, 400 MHz

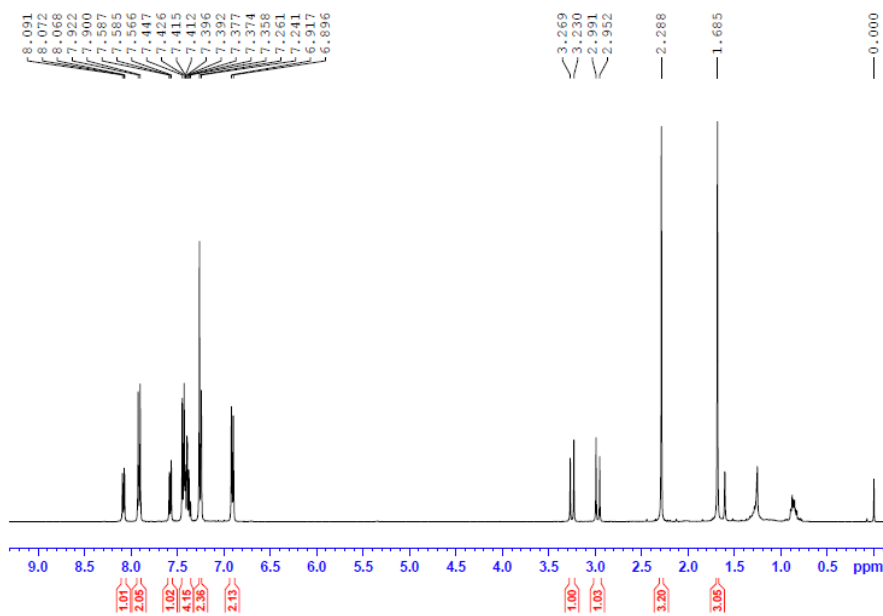

$\text{CDCl}_3$ ,  $^{13}\text{C}$  NMR, 100 MHz

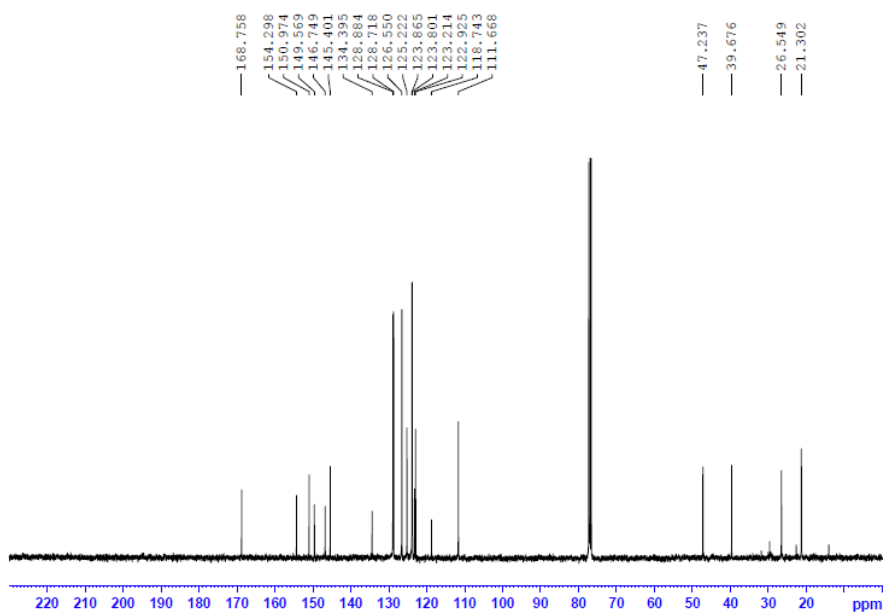

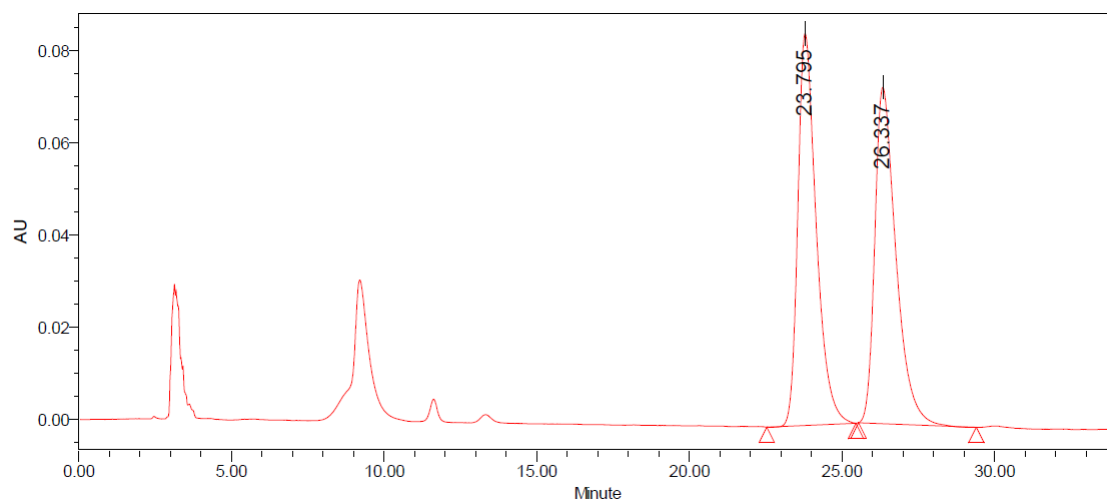

|   | RT<br>(分钟) | Area<br>(微伏*秒) | % Area | Height<br>(微伏) | % Height | Start Time<br>(分钟) | End Time<br>(分钟) |
|---|------------|----------------|--------|----------------|----------|--------------------|------------------|
| 1 | 23.795     | 3561427        | 50.36  | 85000          | 53.81    | 22.538             | 25.460           |
| 2 | 26.337     | 3510324        | 49.64  | 72954          | 46.19    | 25.547             | 29.402           |

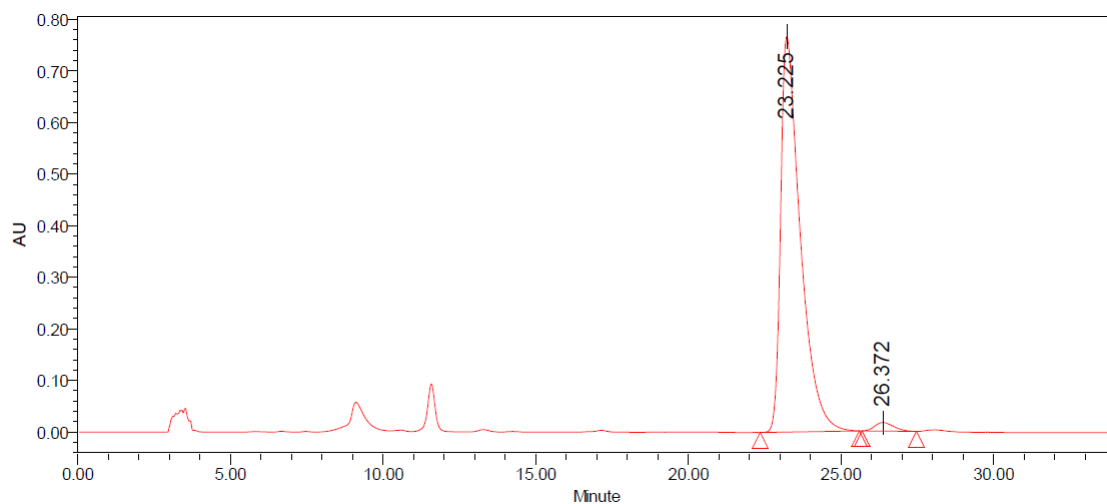

|   | RT<br>(分钟) | Area<br>(微伏*秒) | % Area | Height<br>(微伏) | % Height | Start Time<br>(分钟) | End Time<br>(分钟) |
|---|------------|----------------|--------|----------------|----------|--------------------|------------------|
| 1 | 23.225     | 34303157       | 97.95  | 766931         | 97.87    | 22.353             | 25.602           |
| 2 | 26.372     | 717087         | 2.05   | 16730          | 2.13     | 25.690             | 27.475           |

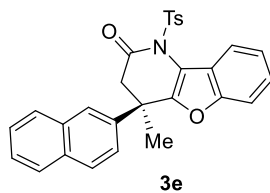

CDCl<sub>3</sub>, <sup>1</sup>H NMR, 400 MHz

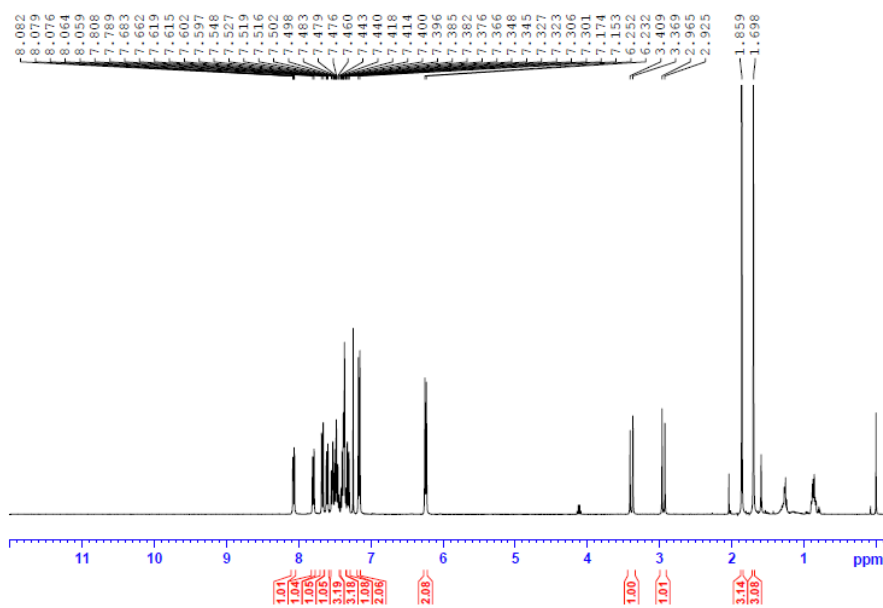

CDCl<sub>3</sub>, <sup>13</sup>C NMR, 100 MHz

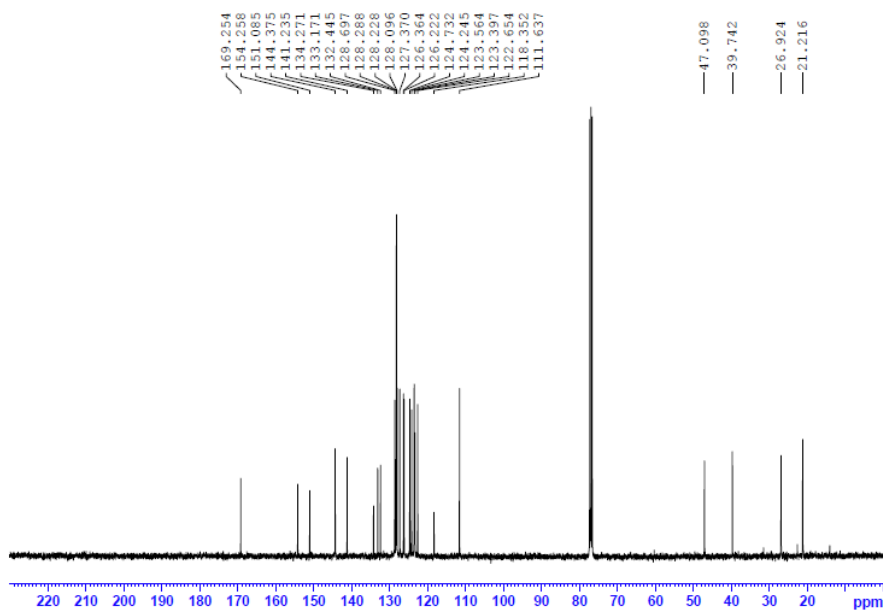

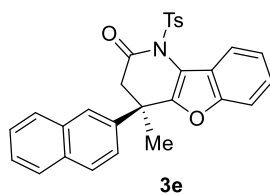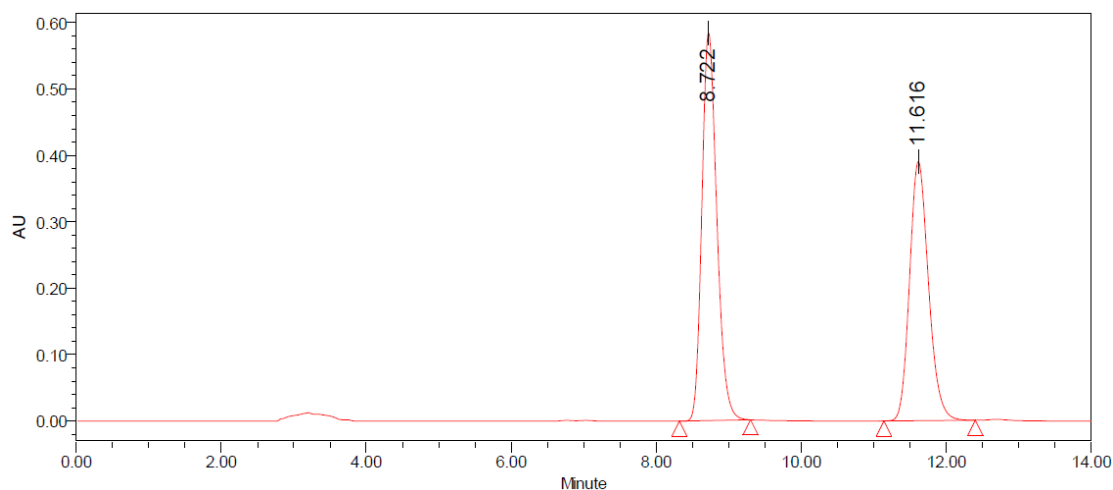

|   | RT<br>(分钟) | Area<br>(微伏*秒) | % Area | Height<br>(微伏) | % Height | Start Time<br>(分钟) | End Time<br>(分钟) |
|---|------------|----------------|--------|----------------|----------|--------------------|------------------|
| 1 | 8.722      | 8351247        | 54.14  | 583578         | 59.94    | 8.320              | 9.300            |
| 2 | 11.616     | 7072792        | 45.86  | 390030         | 40.06    | 11.142             | 12.402           |

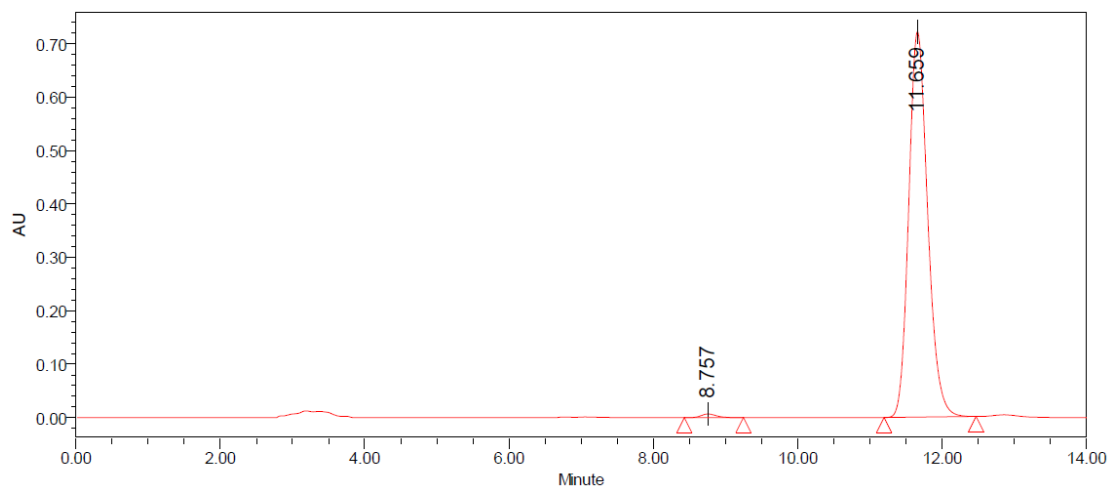

|   | RT<br>(分钟) | Area<br>(微伏*秒) | % Area | Height<br>(微伏) | % Height | Start Time<br>(分钟) | End Time<br>(分钟) |
|---|------------|----------------|--------|----------------|----------|--------------------|------------------|
| 1 | 8.757      | 95665          | 0.72   | 6656           | 0.91     | 8.428              | 9.248            |
| 2 | 11.659     | 13164958       | 99.28  | 721533         | 99.09    | 11.197             | 12.472           |

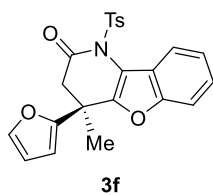

CDCl<sub>3</sub>, <sup>1</sup>H NMR, 400 MHz

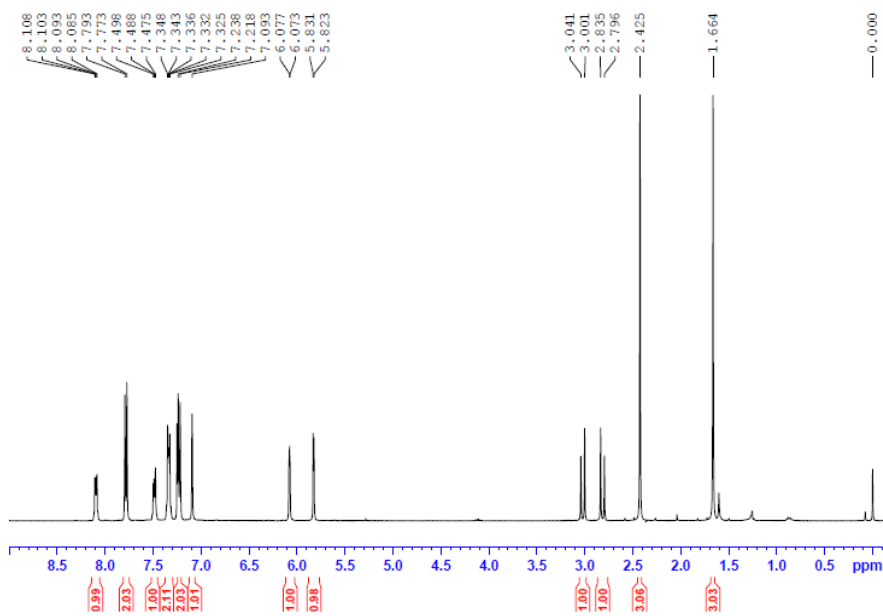

CDCl<sub>3</sub>, <sup>13</sup>C NMR, 100 MHz

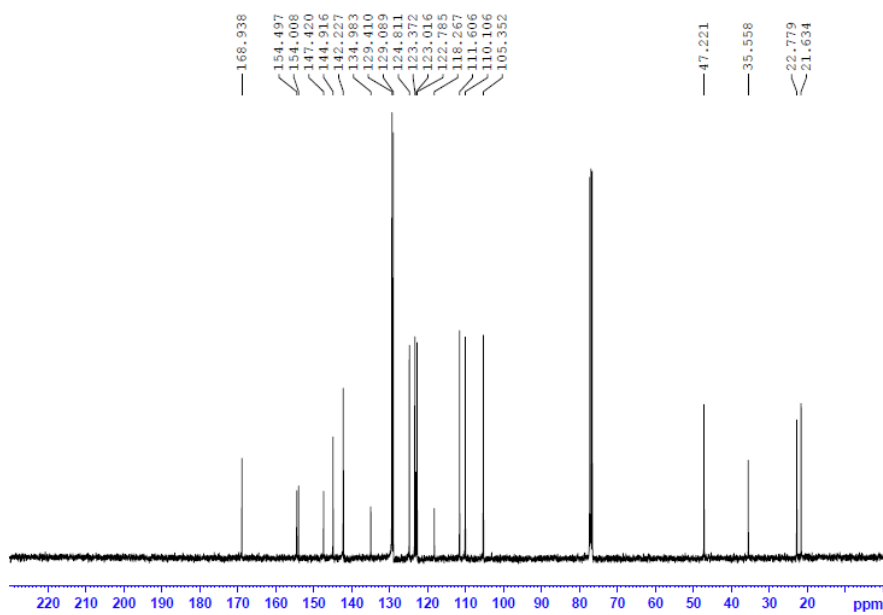

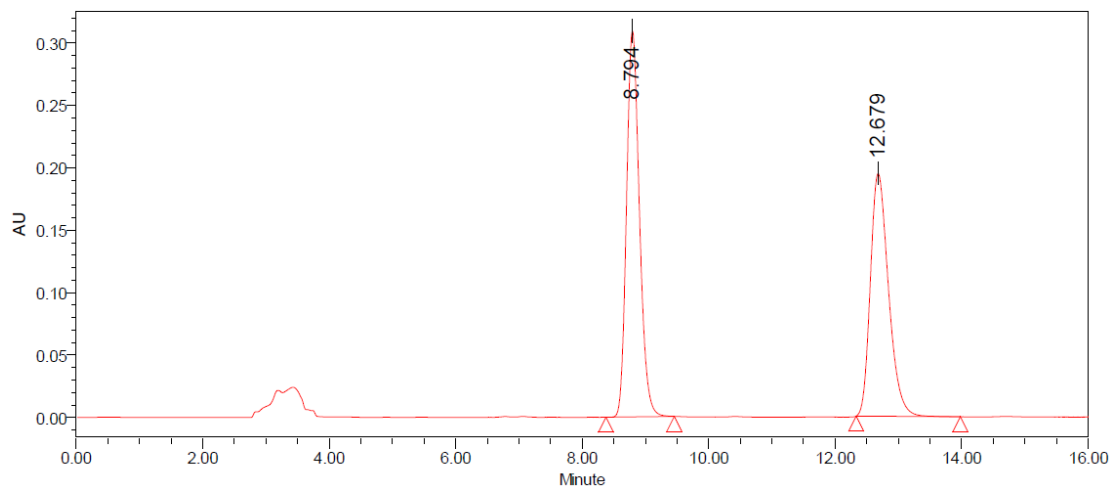

|   | RT<br>(分钟) | Area<br>(微伏*秒) | % Area | Height<br>(微伏) | % Height | Start Time<br>(分钟) | End Time<br>(分钟) |
|---|------------|----------------|--------|----------------|----------|--------------------|------------------|
| 1 | 8.794      | 4390033        | 53.13  | 309343         | 61.39    | 8.377              | 9.457            |
| 2 | 12.679     | 3872450        | 46.87  | 194539         | 38.61    | 12.332             | 13.978           |

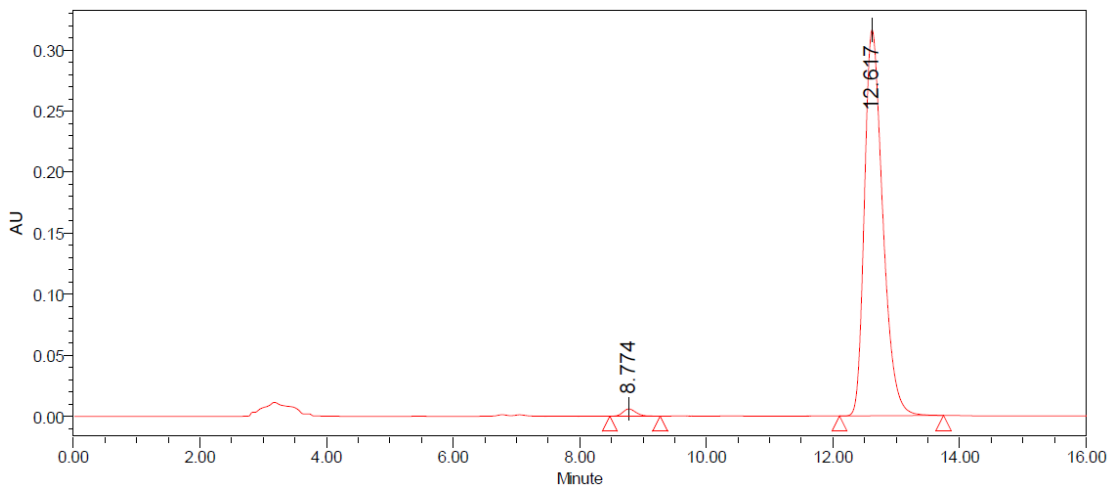

|   | RT<br>(分钟) | Area<br>(微伏*秒) | % Area | Height<br>(微伏) | % Height | Start Time<br>(分钟) | End Time<br>(分钟) |
|---|------------|----------------|--------|----------------|----------|--------------------|------------------|
| 1 | 8.774      | 83758          | 1.30   | 5929           | 1.84     | 8.473              | 9.268            |
| 2 | 12.617     | 6352054        | 98.70  | 316014         | 98.16    | 12.102             | 13.745           |

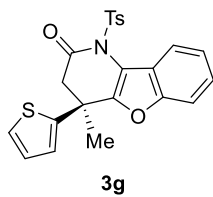

CDCl<sub>3</sub>, <sup>1</sup>H NMR, 400 MHz

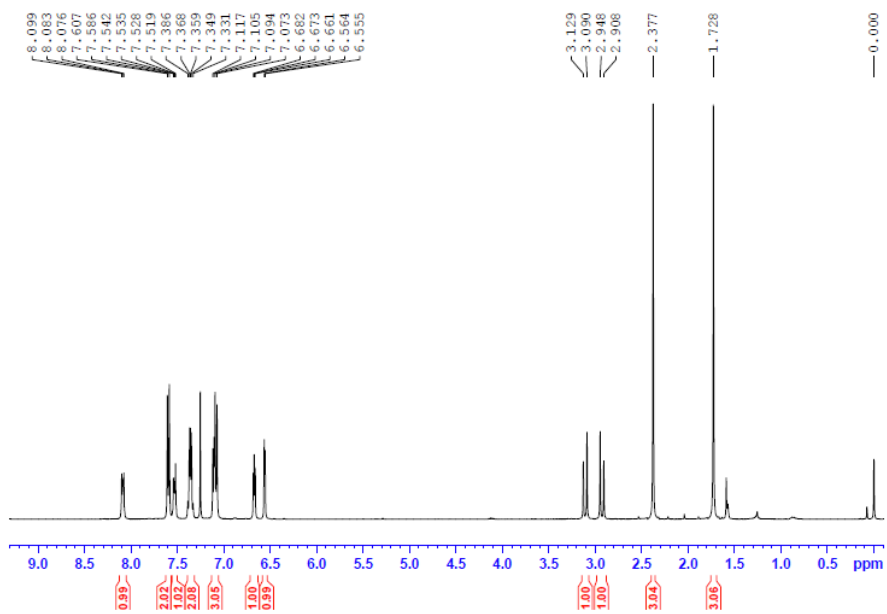

CDCl<sub>3</sub>, <sup>13</sup>C NMR, 100 MHz

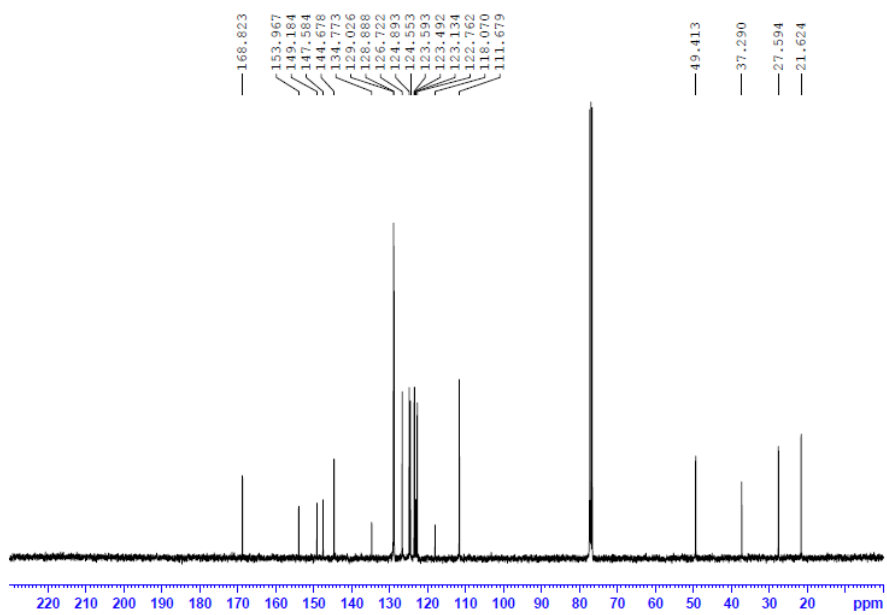



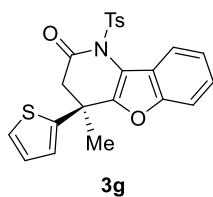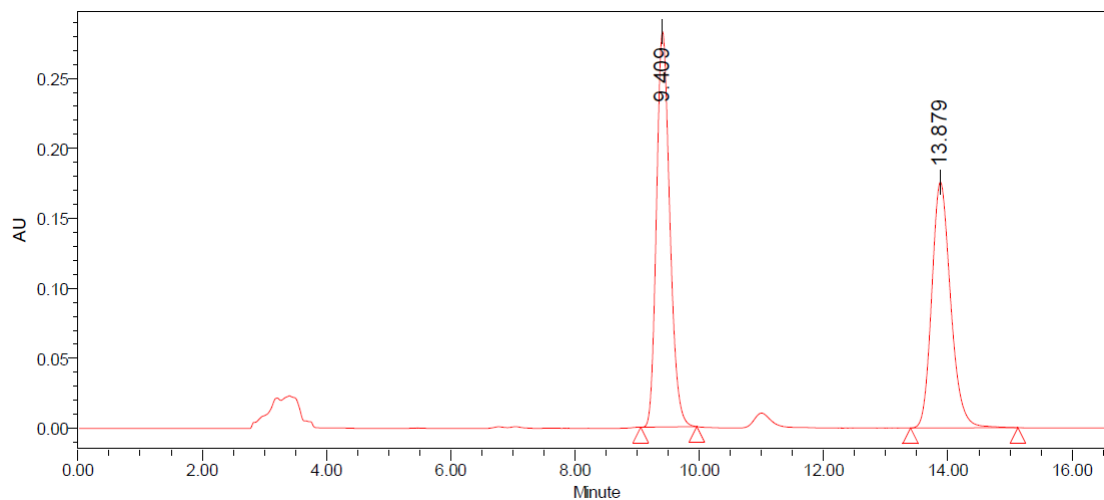

|   | RT<br>(分钟) | Area<br>(微伏*秒) | % Area | Height<br>(微伏) | % Height | Start Time<br>(分钟) | End Time<br>(分钟) |
|---|------------|----------------|--------|----------------|----------|--------------------|------------------|
| 1 | 9.409      | 4201292        | 53.13  | 282472         | 61.67    | 9.057              | 9.960            |
| 2 | 13.879     | 3706035        | 46.87  | 175557         | 38.33    | 13.398             | 15.127           |

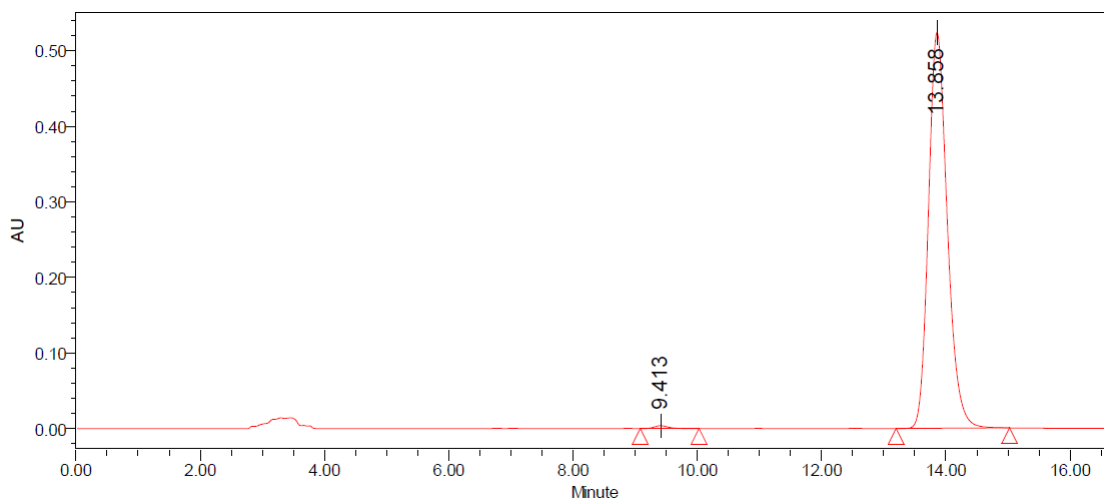

|   | RT<br>(分钟) | Area<br>(微伏*秒) | % Area | Height<br>(微伏) | % Height | Start Time<br>(分钟) | End Time<br>(分钟) |
|---|------------|----------------|--------|----------------|----------|--------------------|------------------|
| 1 | 9.413      | 56080          | 0.51   | 3734           | 0.71     | 9.083              | 10.028           |
| 2 | 13.858     | 11017295       | 99.49  | 523620         | 99.29    | 13.198             | 15.023           |

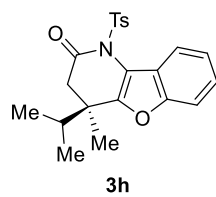

CDCl<sub>3</sub>, <sup>1</sup>H NMR, 400 MHz

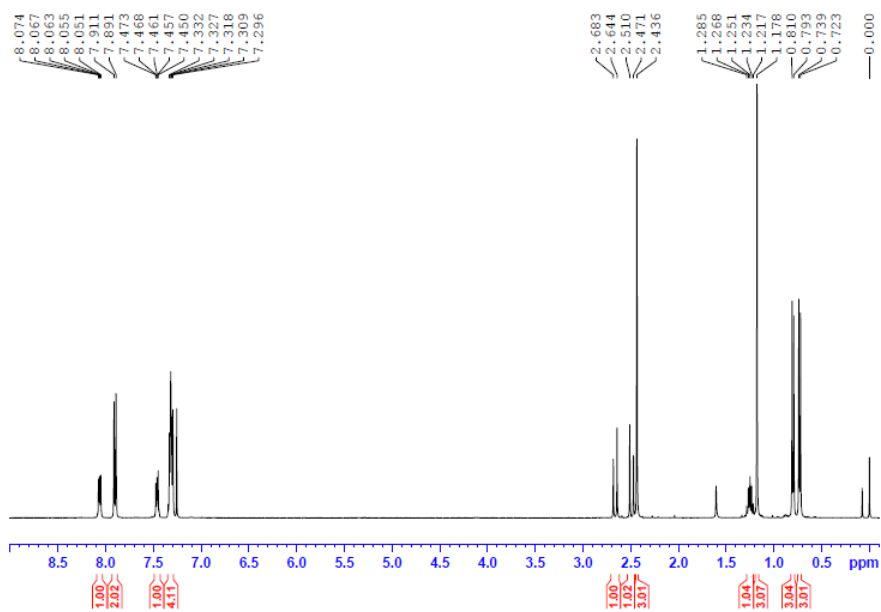

CDCl<sub>3</sub>, <sup>13</sup>C NMR, 100 MHz

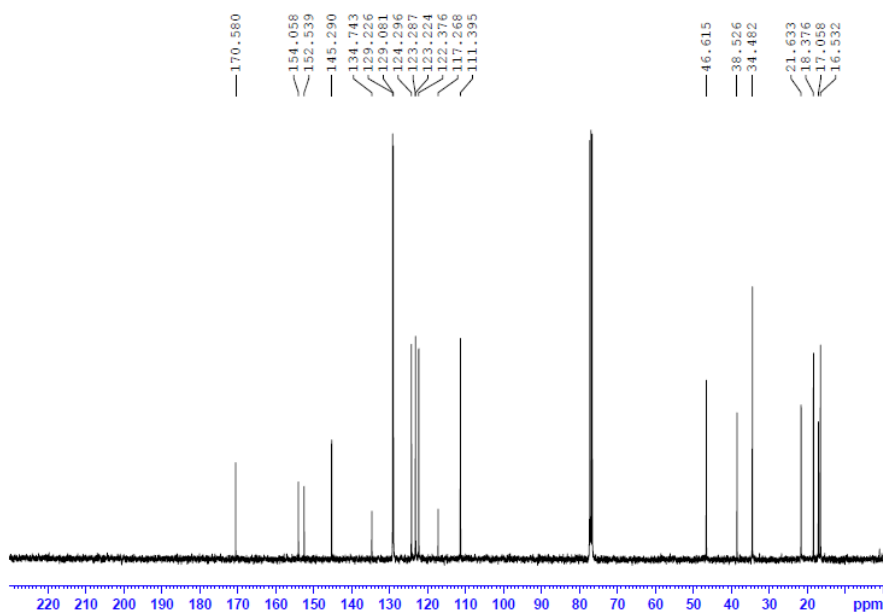

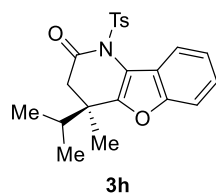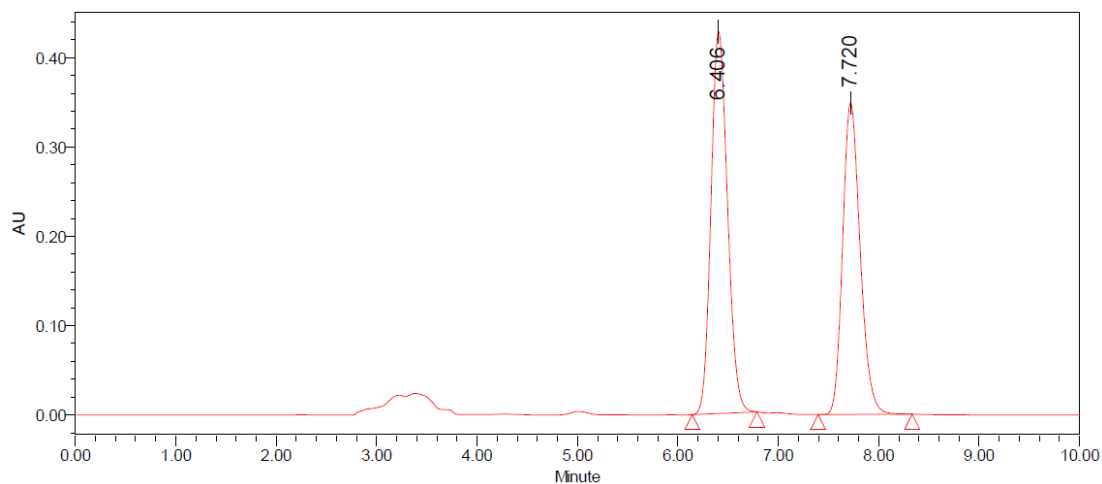

|   | RT<br>(分钟) | Area<br>(微伏*秒) | % Area | Height<br>(微伏) | % Height | Start Time<br>(分钟) | End Time<br>(分钟) |
|---|------------|----------------|--------|----------------|----------|--------------------|------------------|
| 1 | 6.406      | 4881447        | 53.58  | 427473         | 55.06    | 6.143              | 6.788            |
| 2 | 7.720      | 4228853        | 46.42  | 348855         | 44.94    | 7.397              | 8.333            |

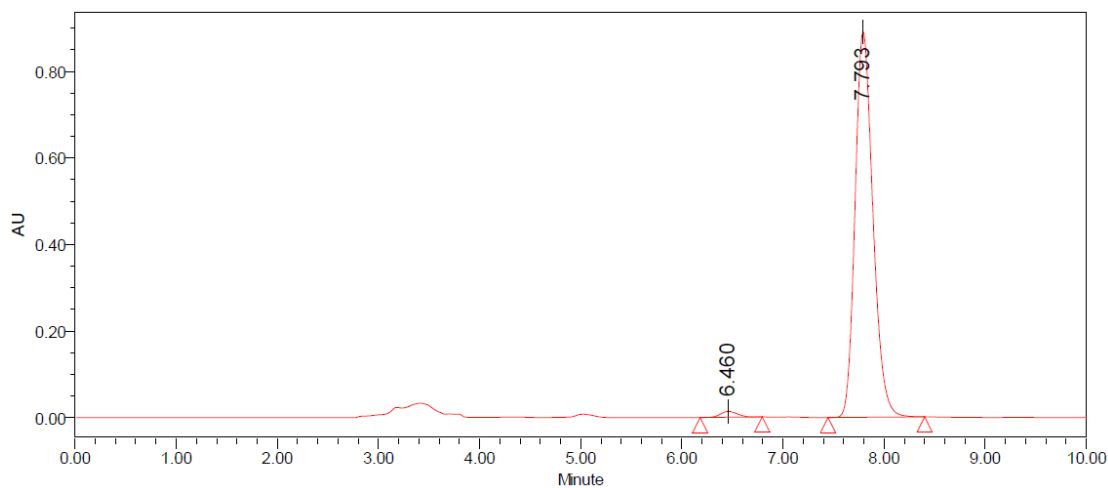

|   | RT<br>(分钟) | Area<br>(微伏*秒) | % Area | Height<br>(微伏) | % Height | Start Time<br>(分钟) | End Time<br>(分钟) |
|---|------------|----------------|--------|----------------|----------|--------------------|------------------|
| 1 | 6.460      | 151535         | 1.37   | 13232          | 1.46     | 6.182              | 6.795            |
| 2 | 7.793      | 10928163       | 98.63  | 890583         | 98.54    | 7.445              | 8.400            |

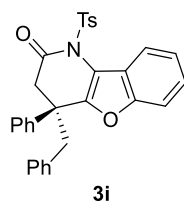

CDCl<sub>3</sub>, <sup>1</sup>H NMR, 400 MHz

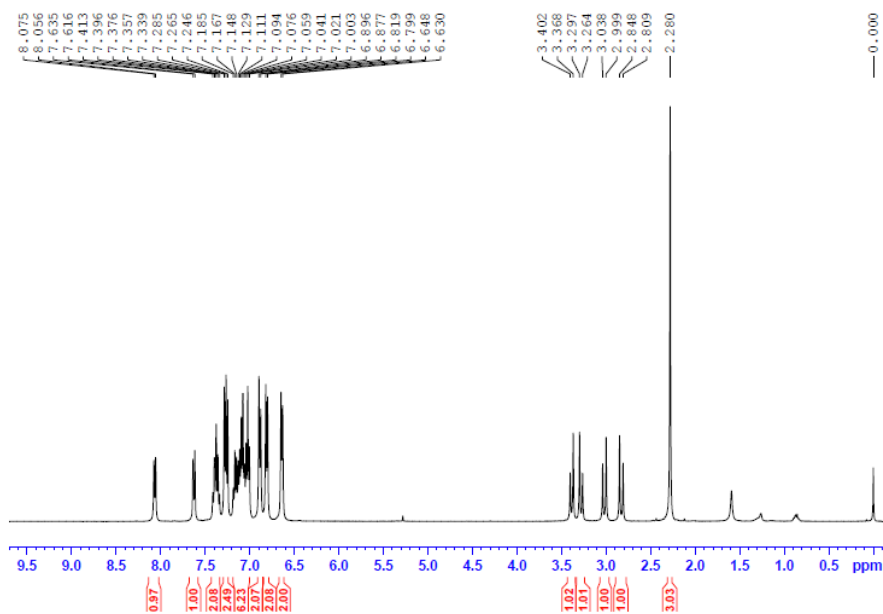

CDCl<sub>3</sub>, <sup>13</sup>C NMR, 100 MHz

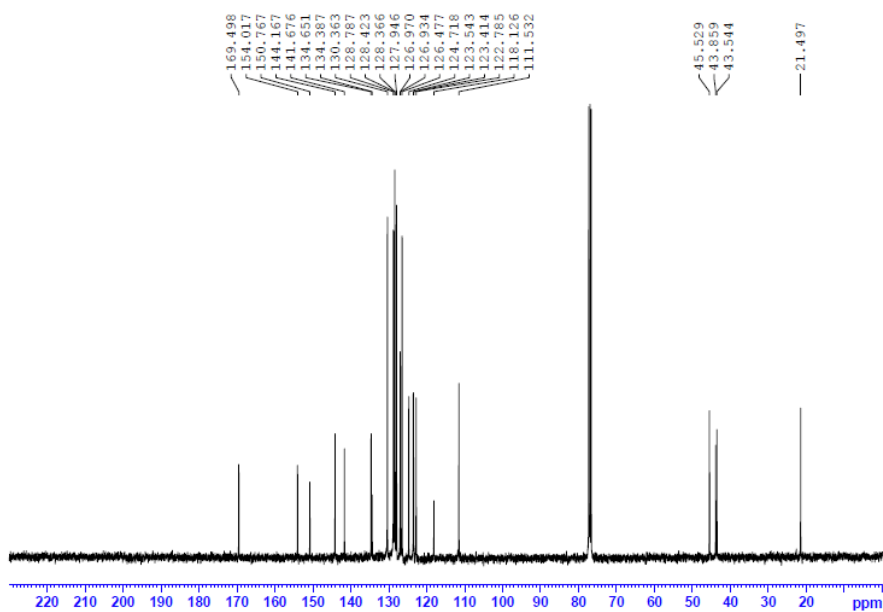

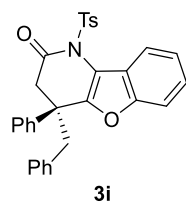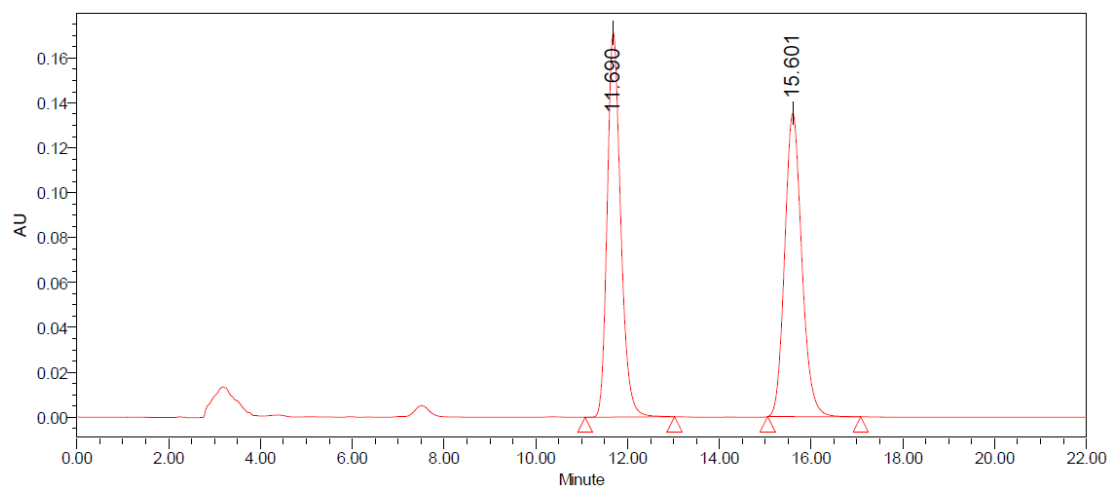

|   | RT<br>(分钟) | Area<br>(微伏*秒) | % Area | Height<br>(微伏) | % Height | Start Time<br>(分钟) | End Time<br>(分钟) |
|---|------------|----------------|--------|----------------|----------|--------------------|------------------|
| 1 | 11.690     | 3491155        | 49.97  | 171218         | 55.89    | 11.075             | 13.025           |
| 2 | 15.601     | 3496037        | 50.03  | 135114         | 44.11    | 15.055             | 17.083           |

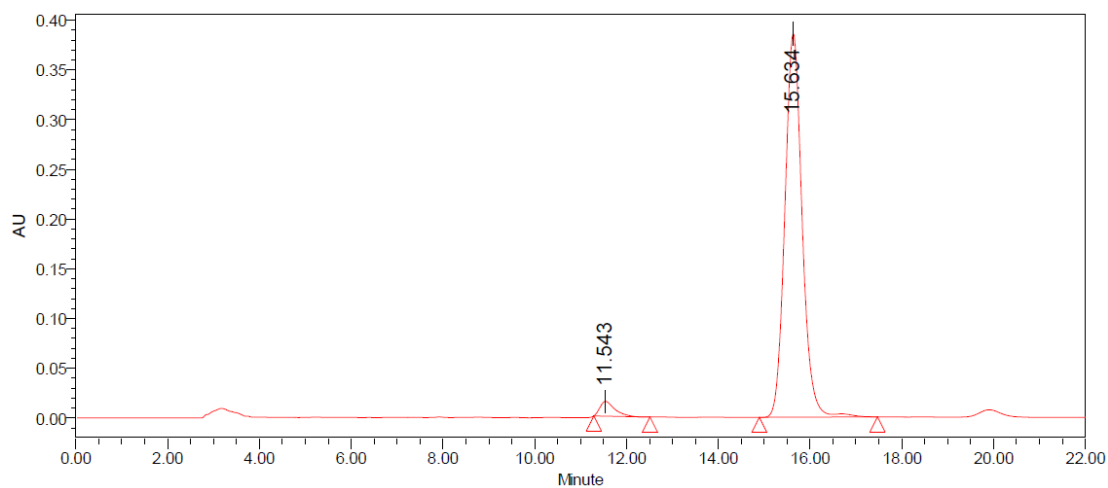

|   | RT<br>(分钟) | Area<br>(微伏*秒) | % Area | Height<br>(微伏) | % Height | Start Time<br>(分钟) | End Time<br>(分钟) |
|---|------------|----------------|--------|----------------|----------|--------------------|------------------|
| 1 | 11.543     | 333671         | 3.21   | 14864          | 3.71     | 11.288             | 12.510           |
| 2 | 15.634     | 10075913       | 96.79  | 385654         | 96.29    | 14.897             | 17.470           |

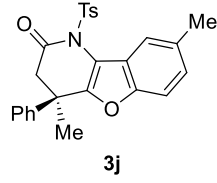

CDCl<sub>3</sub>, <sup>1</sup>H NMR, 400 MHz

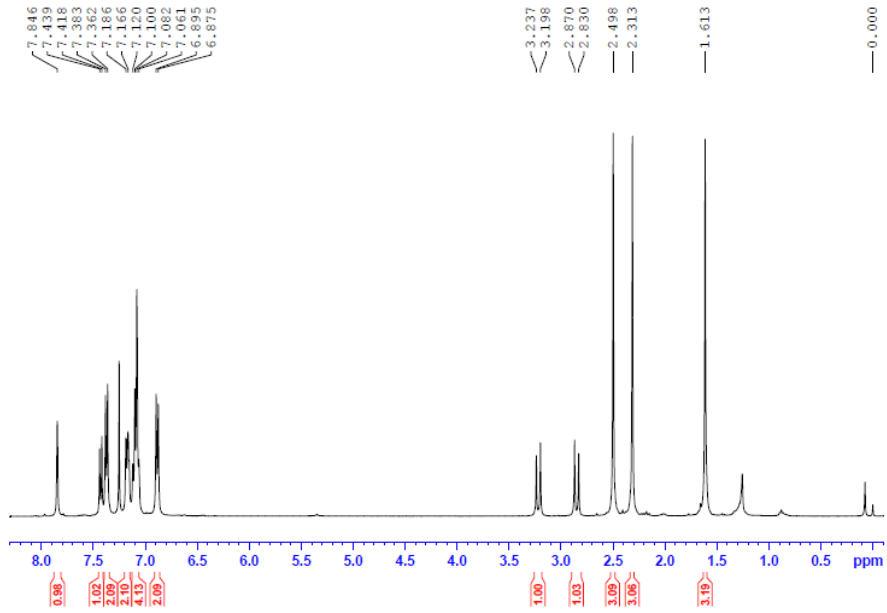

CDCl<sub>3</sub>, <sup>13</sup>C NMR, 100 MHz

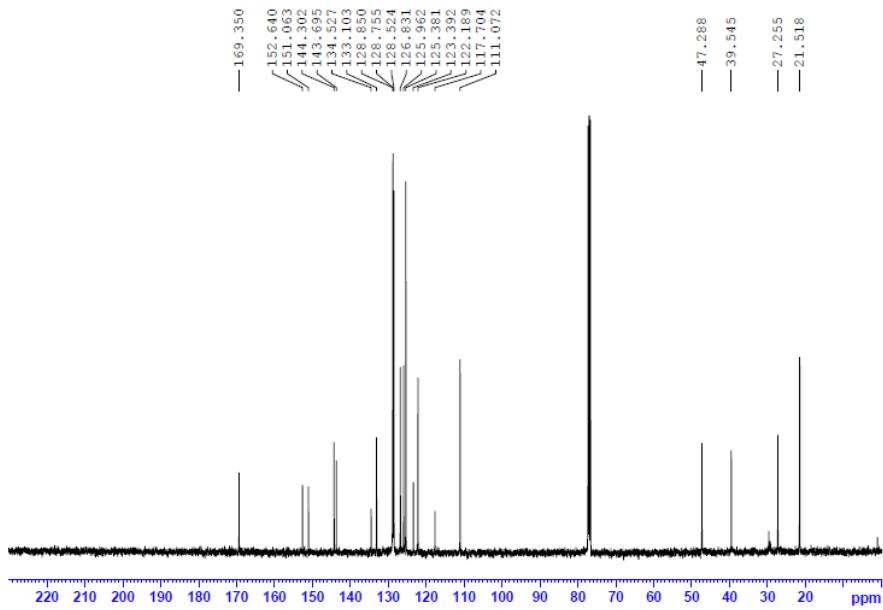

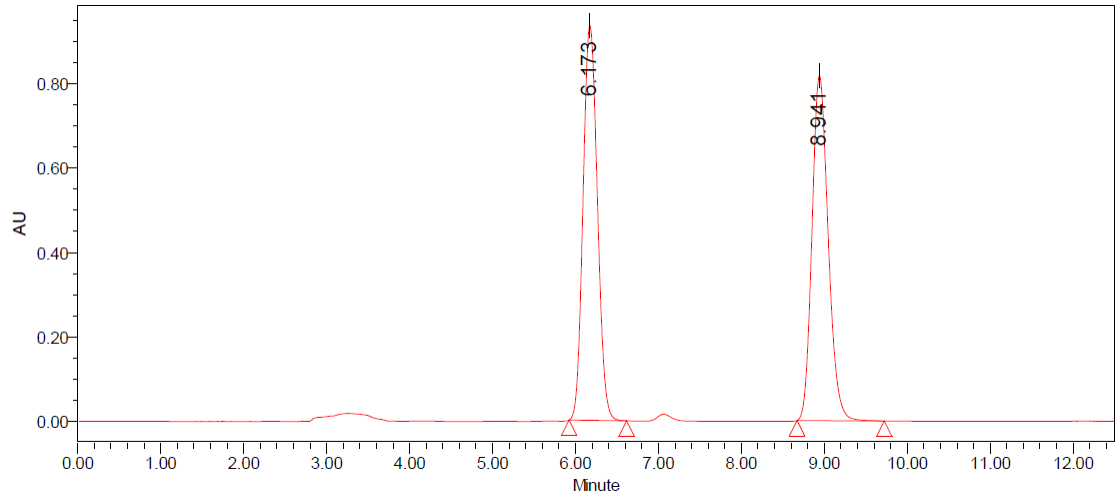

|   | RT<br>(分钟) | Area<br>(微伏*秒) | % Area | Height<br>(微伏) | % Height | Start Time<br>(分钟) | End Time<br>(分钟) |
|---|------------|----------------|--------|----------------|----------|--------------------|------------------|
| 1 | 6.173      | 11230665       | 50.31  | 935555         | 53.38    | 5.922              | 6.617            |
| 2 | 8.941      | 11092842       | 49.69  | 817016         | 46.62    | 8.672              | 9.722            |

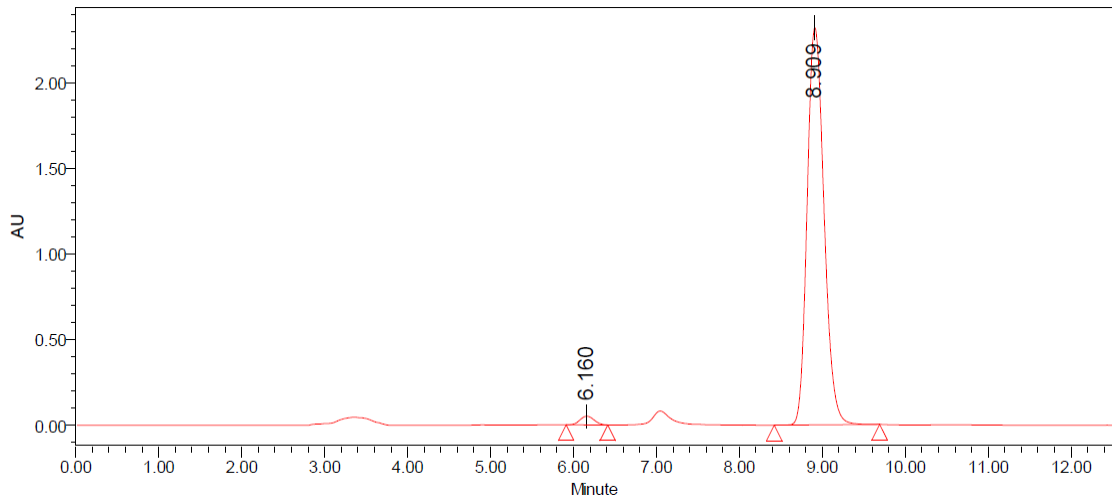

|   | RT<br>(分钟) | Area<br>(微伏*秒) | % Area | Height<br>(微伏) | % Height | Start Time<br>(分钟) | End Time<br>(分钟) |
|---|------------|----------------|--------|----------------|----------|--------------------|------------------|
| 1 | 6.160      | 601866         | 1.81   | 50795          | 2.14     | 5.912              | 6.413            |
| 2 | 8.909      | 32730520       | 98.19  | 2320483        | 97.86    | 8.420              | 9.690            |

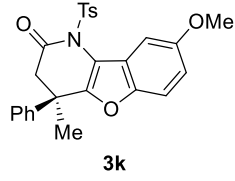

CDCl<sub>3</sub>, <sup>1</sup>H NMR, 400 MHz

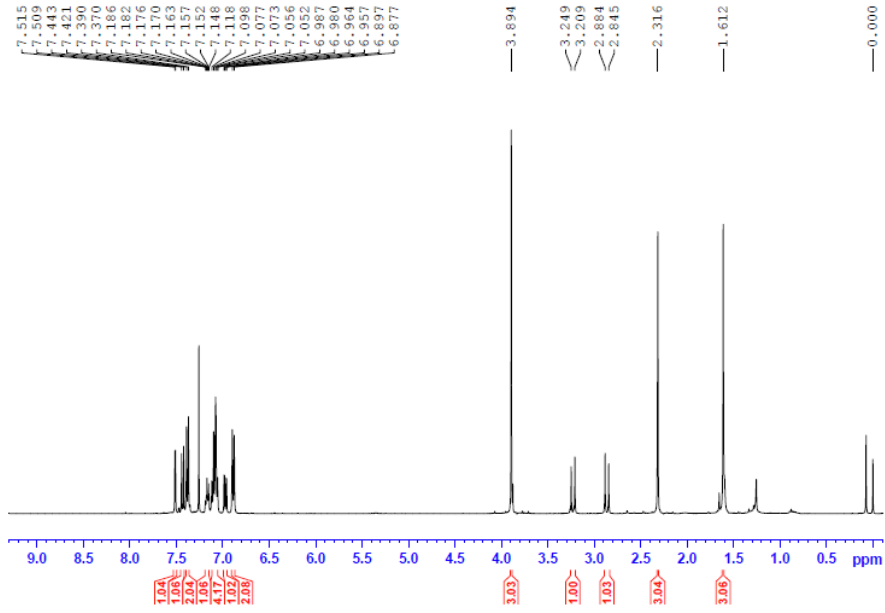

CDCl<sub>3</sub>, <sup>13</sup>C NMR, 100 MHz

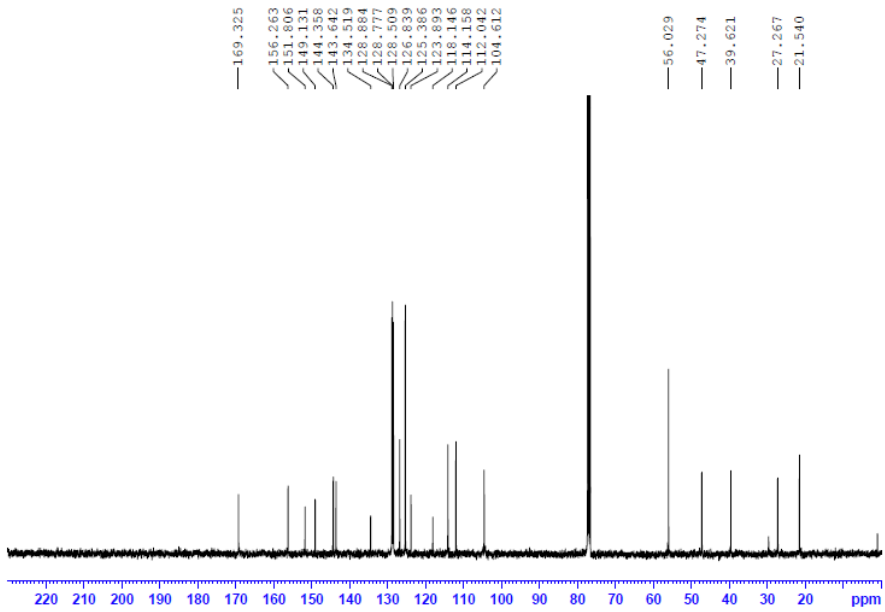



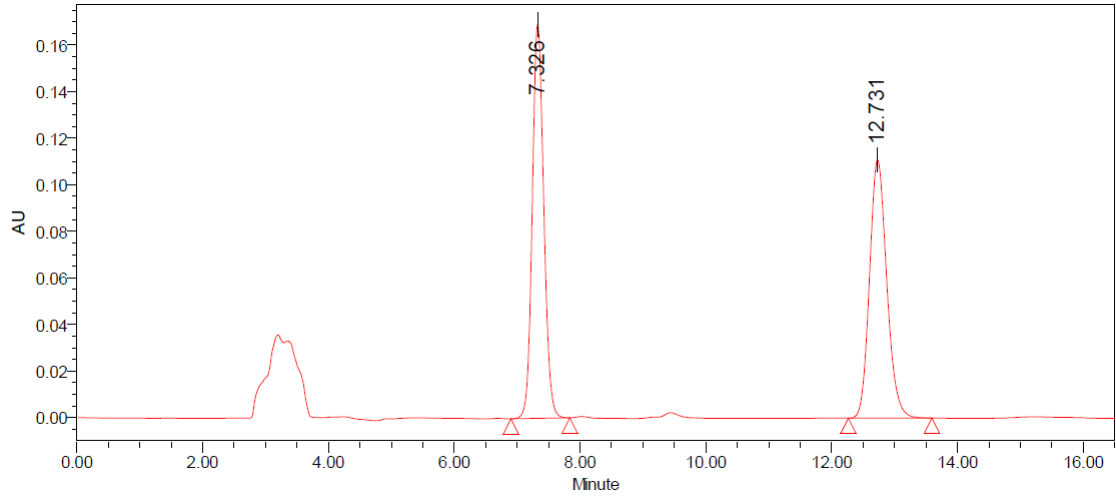

|   | RT<br>(分钟) | Area<br>(微伏*秒) | % Area | Height<br>(微伏) | % Height | Start Time<br>(分钟) | End Time<br>(分钟) |
|---|------------|----------------|--------|----------------|----------|--------------------|------------------|
| 1 | 7.326      | 2149444        | 50.43  | 169124         | 60.40    | 6.902              | 7.837            |
| 2 | 12.731     | 2112493        | 49.57  | 110891         | 39.60    | 12.267             | 13.593           |

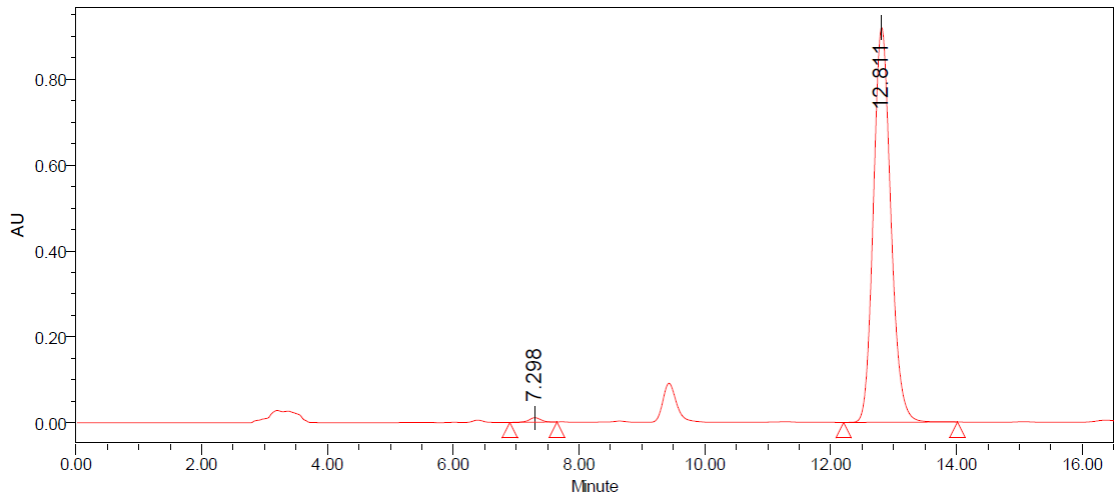

|   | RT<br>(分钟) | Area<br>(微伏*秒) | % Area | Height<br>(微伏) | % Height | Start Time<br>(分钟) | End Time<br>(分钟) |
|---|------------|----------------|--------|----------------|----------|--------------------|------------------|
| 1 | 7.298      | 137296         | 0.77   | 10438          | 1.12     | 6.898              | 7.650            |
| 2 | 12.811     | 17746852       | 99.23  | 919580         | 98.88    | 12.207             | 14.017           |

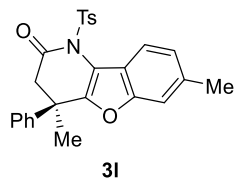

$\text{CDCl}_3$ ,  $^1\text{H}$  NMR, 400 MHz

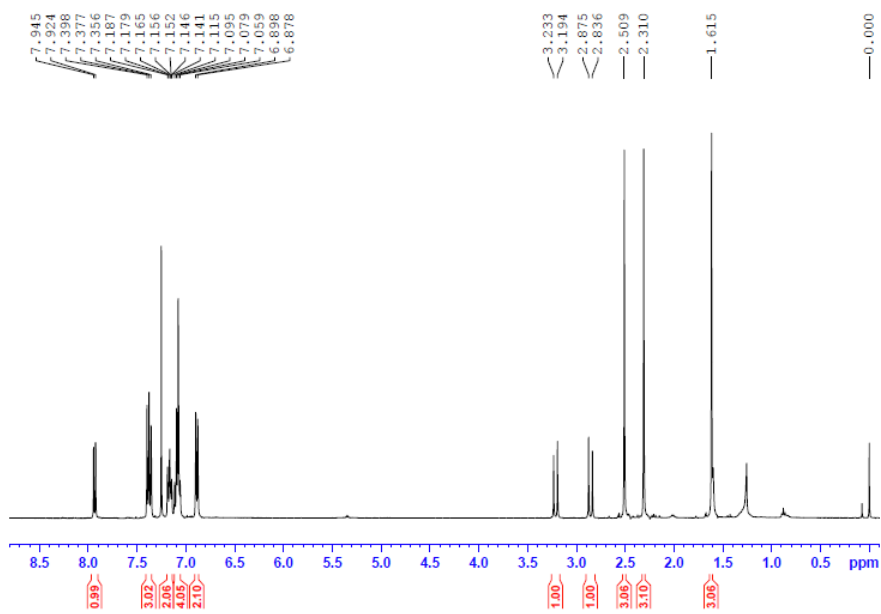

$\text{CDCl}_3$ ,  $^{13}\text{C}$  NMR, 100 MHz

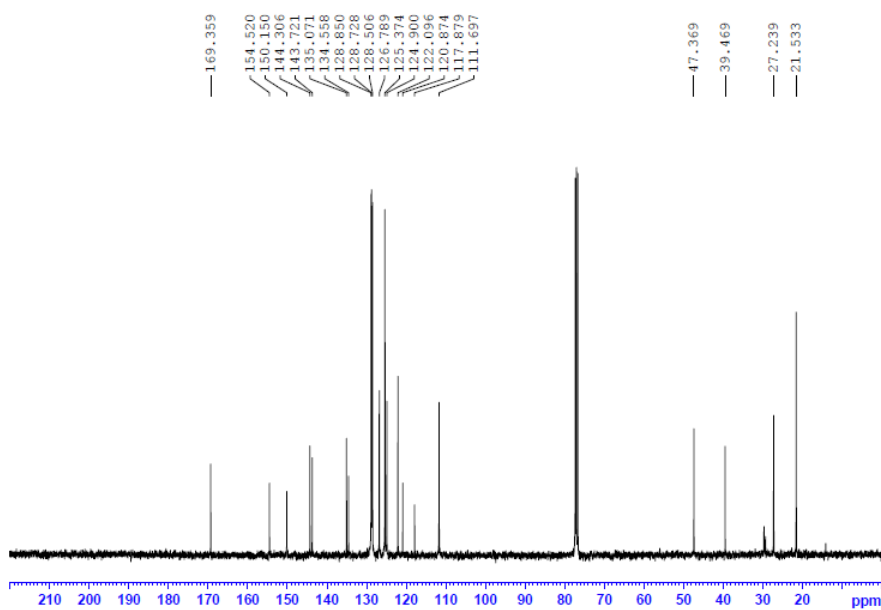

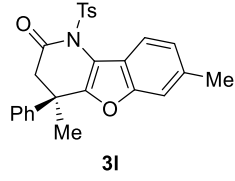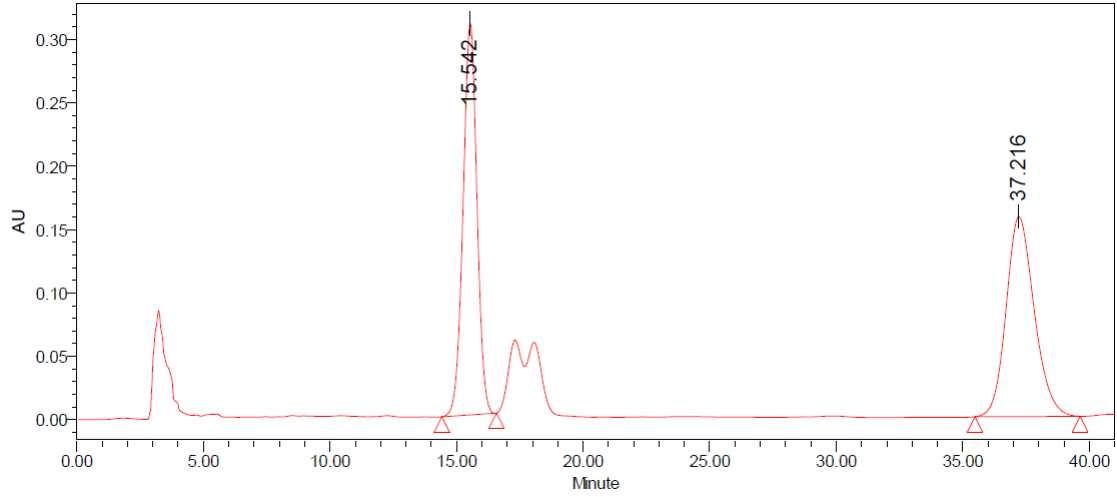

|   | RT<br>(分钟) | Area<br>(微伏*秒) | % Area | Height<br>(微伏) | % Height | Start Time<br>(分钟) | End Time<br>(分钟) |
|---|------------|----------------|--------|----------------|----------|--------------------|------------------|
| 1 | 15.542     | 11784032       | 49.16  | 309041         | 66.18    | 14.420             | 16.578           |
| 2 | 37.216     | 12187296       | 50.84  | 157962         | 33.82    | 35.482             | 39.635           |

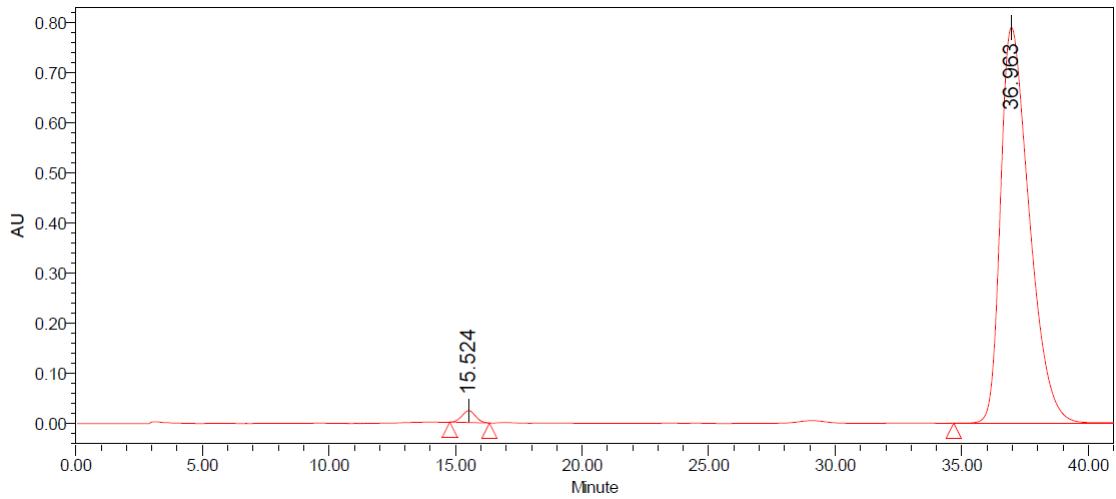

|   | RT<br>(分钟) | Area<br>(微伏*秒) | % Area | Height<br>(微伏) | % Height | Start Time<br>(分钟) | End Time<br>(分钟) |
|---|------------|----------------|--------|----------------|----------|--------------------|------------------|
| 1 | 15.524     | 878913         | 1.39   | 23804          | 2.93     | 14.773             | 16.338           |
| 2 | 36.963     | 62432681       | 98.61  | 789219         | 97.07    | 34.682             | 42.120           |

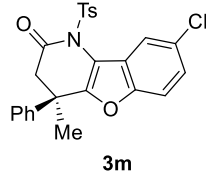

$\text{CDCl}_3$ ,  $^1\text{H}$  NMR, 400 MHz

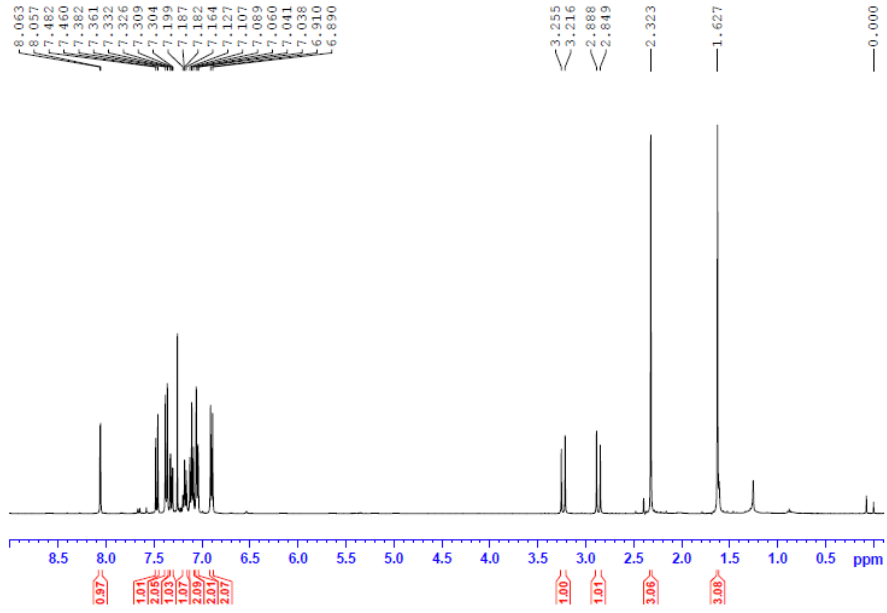

$\text{CDCl}_3$ ,  $^{13}\text{C}$  NMR, 100 MHz

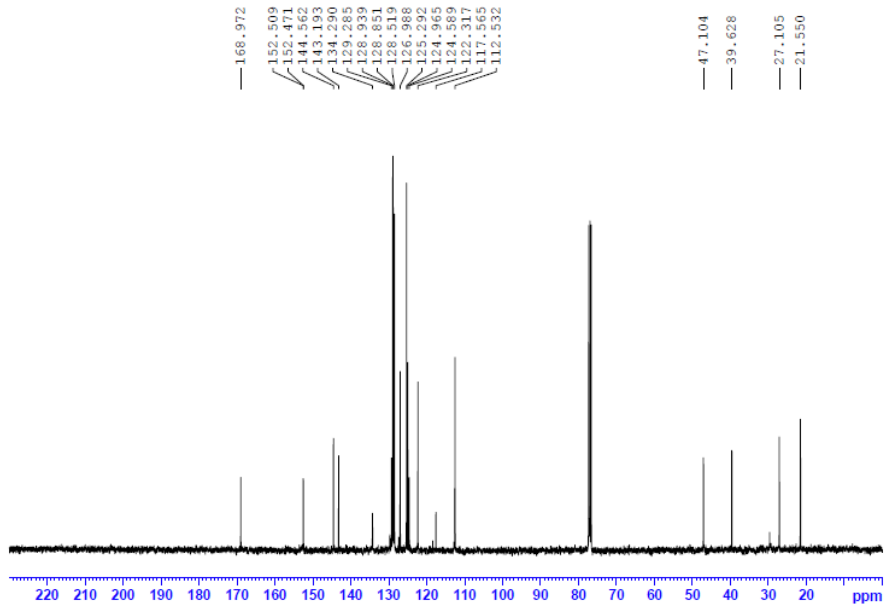

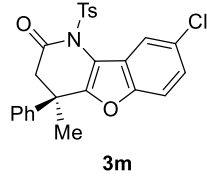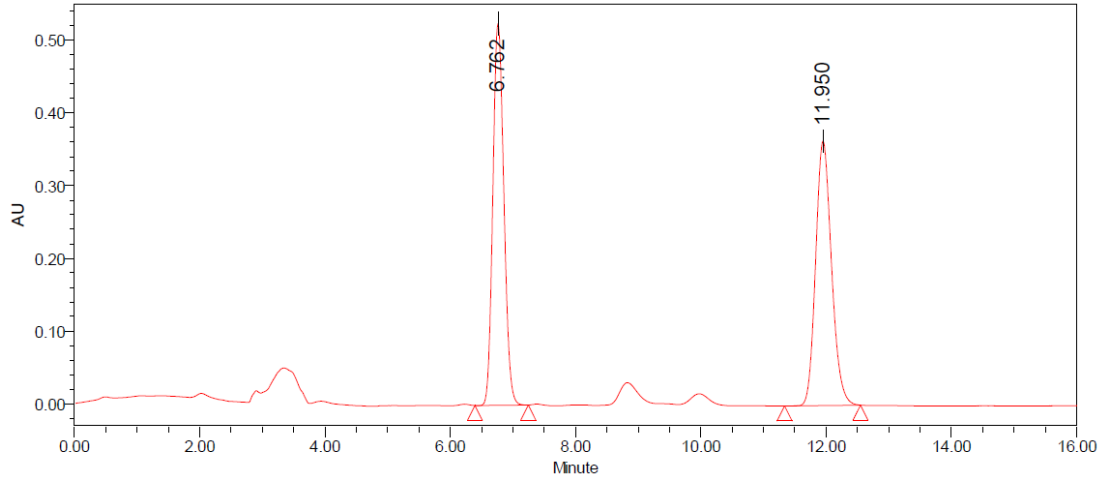

|   | RT<br>(分钟) | Area<br>(微伏*秒) | % Area | Height<br>(微伏) | % Height | Start Time<br>(分钟) | End Time<br>(分钟) |
|---|------------|----------------|--------|----------------|----------|--------------------|------------------|
| 1 | 6.762      | 6417412        | 50.07  | 525477         | 59.08    | 6.393              | 7.245            |
| 2 | 11.950     | 6399422        | 49.93  | 364004         | 40.92    | 11.337             | 12.548           |

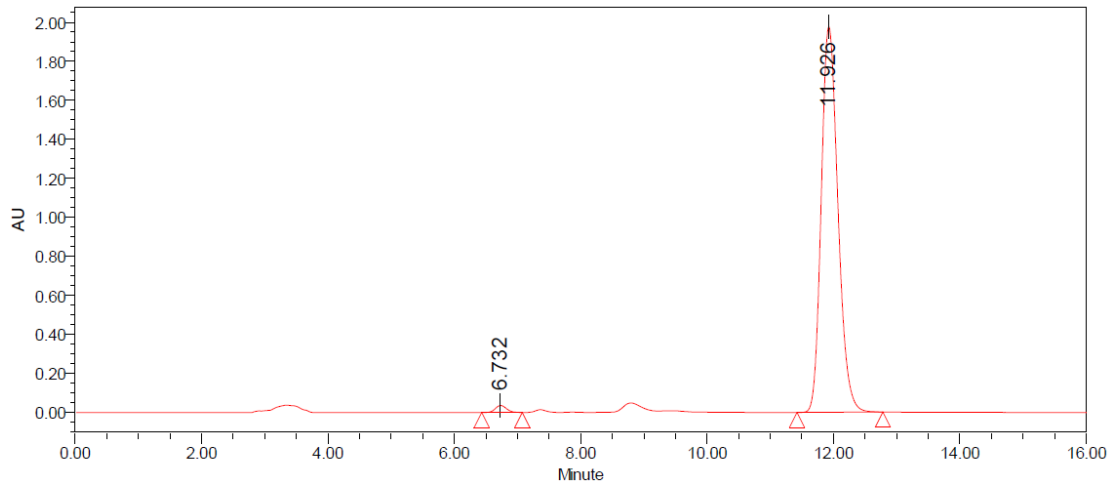

|   | RT<br>(分钟) | Area<br>(微伏*秒) | % Area | Height<br>(微伏) | % Height | Start Time<br>(分钟) | End Time<br>(分钟) |
|---|------------|----------------|--------|----------------|----------|--------------------|------------------|
| 1 | 6.732      | 431122         | 1.18   | 35489          | 1.76     | 6.433              | 7.077            |
| 2 | 11.926     | 36244522       | 98.82  | 1976460        | 98.24    | 11.422             | 12.780           |

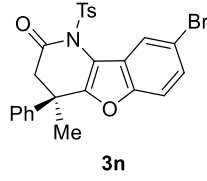

CDCl<sub>3</sub>, <sup>1</sup>H NMR, 400 MHz

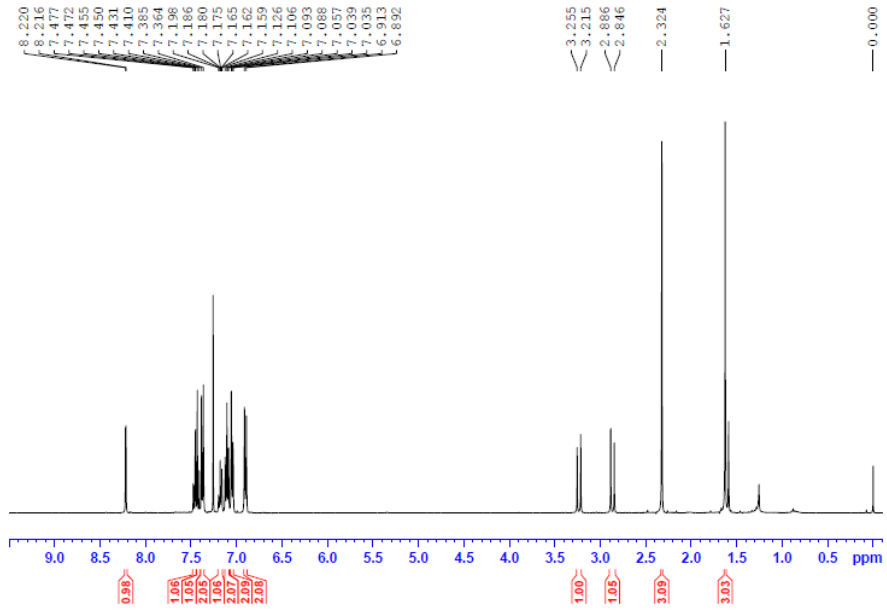

CDCl<sub>3</sub>, <sup>13</sup>C NMR, 100 MHz

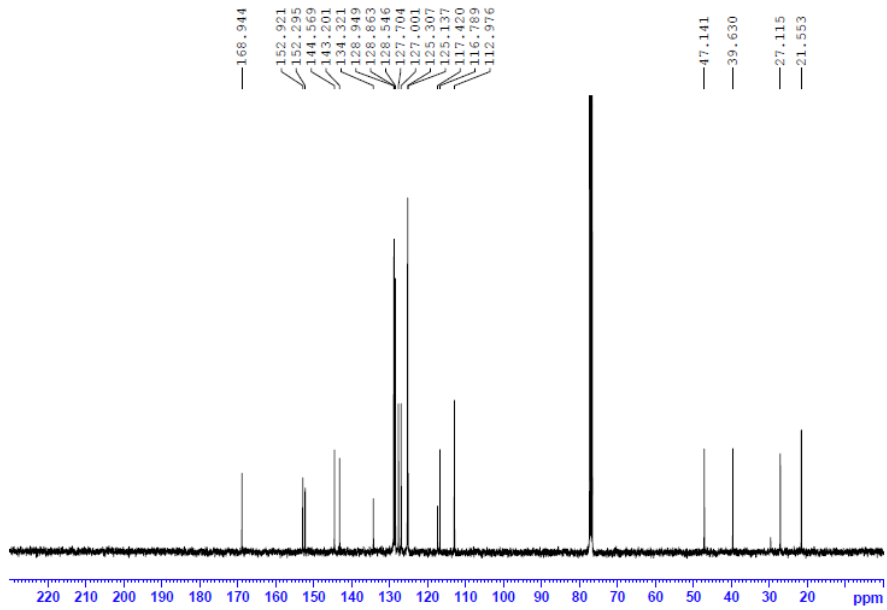

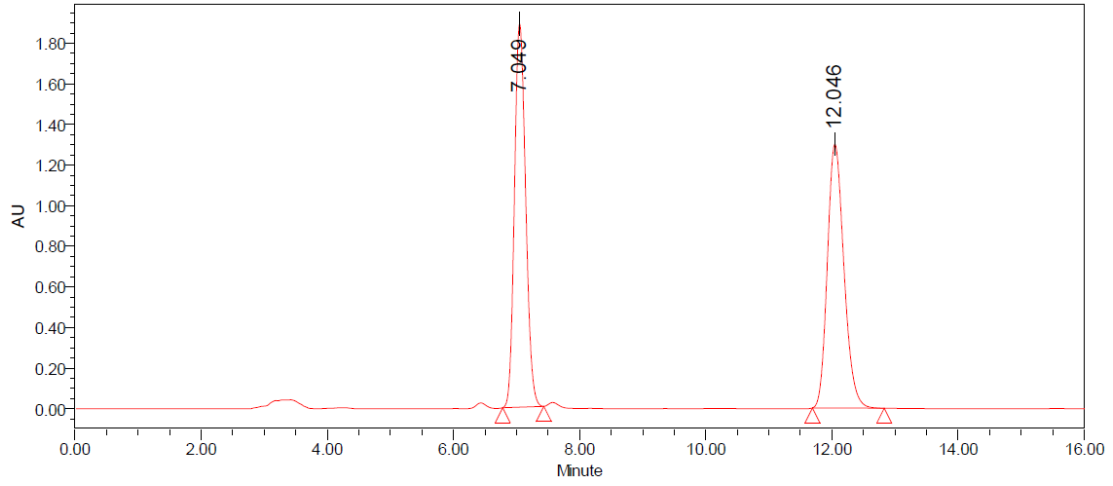

|   | RT<br>(分钟) | Area<br>(微伏*秒) | % Area | Height<br>(微伏) | % Height | Start Time<br>(分钟) | End Time<br>(分钟) |
|---|------------|----------------|--------|----------------|----------|--------------------|------------------|
| 1 | 7.049      | 23336223       | 49.61  | 1888320        | 59.23    | 6.780              | 7.433            |
| 2 | 12.046     | 23705516       | 50.39  | 1299746        | 40.77    | 11.690             | 12.828           |

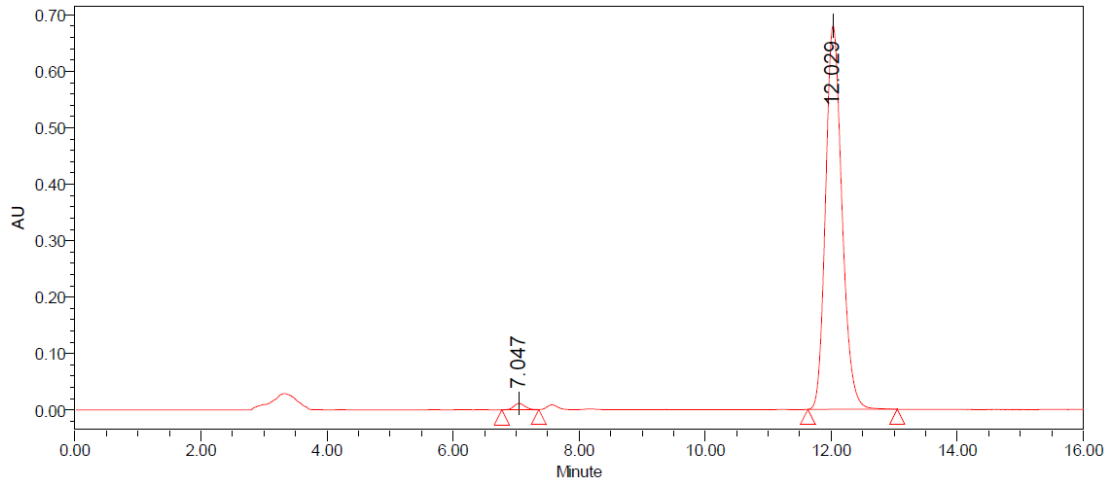

|   | RT<br>(分钟) | Area<br>(微伏*秒) | % Area | Height<br>(微伏) | % Height | Start Time<br>(分钟) | End Time<br>(分钟) |
|---|------------|----------------|--------|----------------|----------|--------------------|------------------|
| 1 | 7.047      | 133172         | 1.07   | 11062          | 1.60     | 6.773              | 7.360            |
| 2 | 12.029     | 12296779       | 98.93  | 679663         | 98.40    | 11.628             | 13.045           |

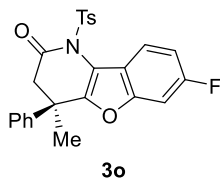

CDCl<sub>3</sub>, <sup>1</sup>H NMR, 400 MHz

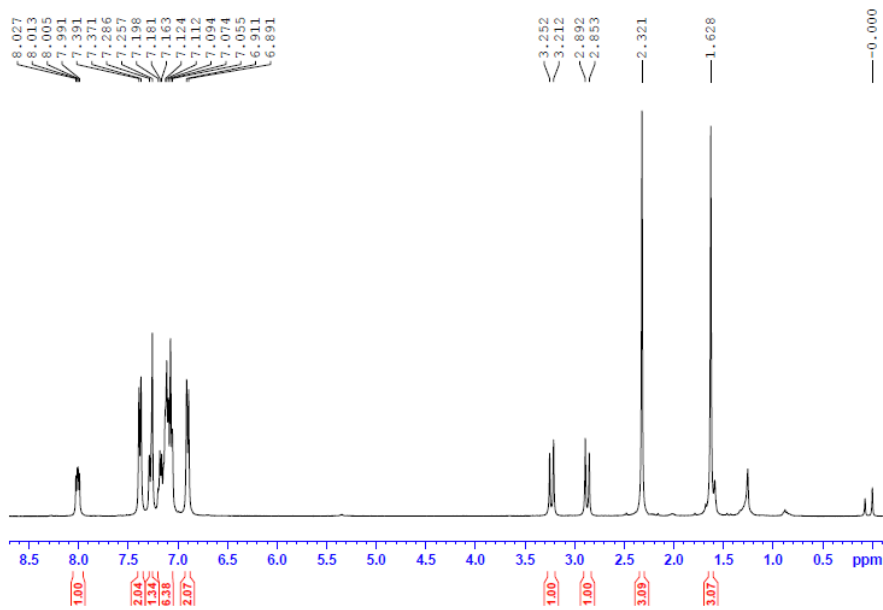

CDCl<sub>3</sub>, <sup>13</sup>C NMR, 100 MHz

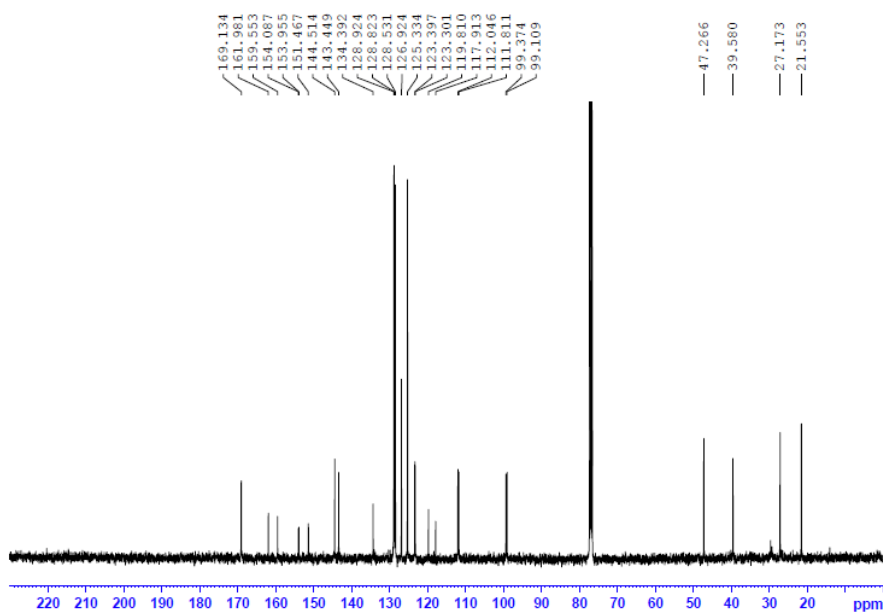



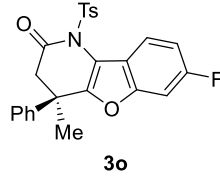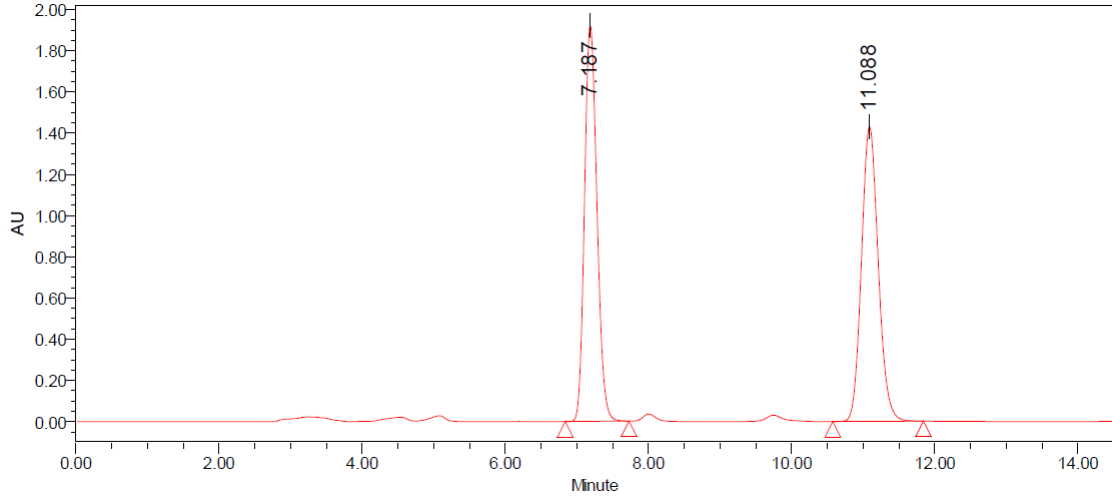

|   | RT<br>(分钟) | Area<br>(微伏*秒) | % Area | Height<br>(微伏) | % Height | Start Time<br>(分钟) | End Time<br>(分钟) |
|---|------------|----------------|--------|----------------|----------|--------------------|------------------|
| 1 | 7.187      | 23138302       | 49.81  | 1920579        | 57.33    | 6.837              | 7.727            |
| 2 | 11.088     | 23316568       | 50.19  | 1429466        | 42.67    | 10.575             | 11.843           |

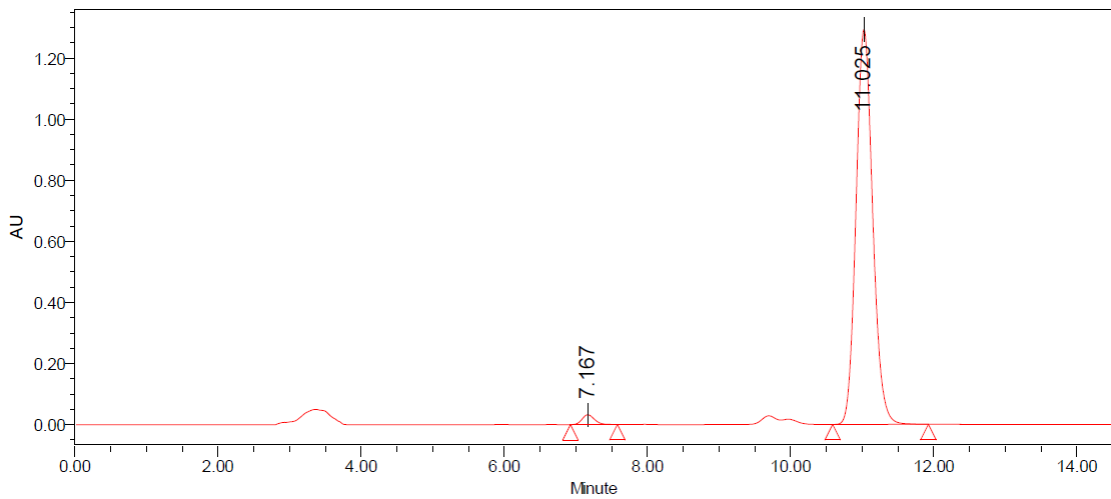

|   | RT<br>(分钟) | Area<br>(微伏*秒) | % Area | Height<br>(微伏) | % Height | Start Time<br>(分钟) | End Time<br>(分钟) |
|---|------------|----------------|--------|----------------|----------|--------------------|------------------|
| 1 | 7.167      | 381227         | 1.79   | 31930          | 2.41     | 6.925              | 7.580            |
| 2 | 11.025     | 20928423       | 98.21  | 1292433        | 97.59    | 10.588             | 11.925           |

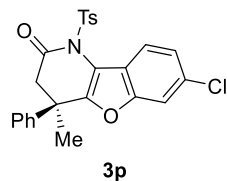

CDCl<sub>3</sub>, <sup>1</sup>H NMR, 400 MHz

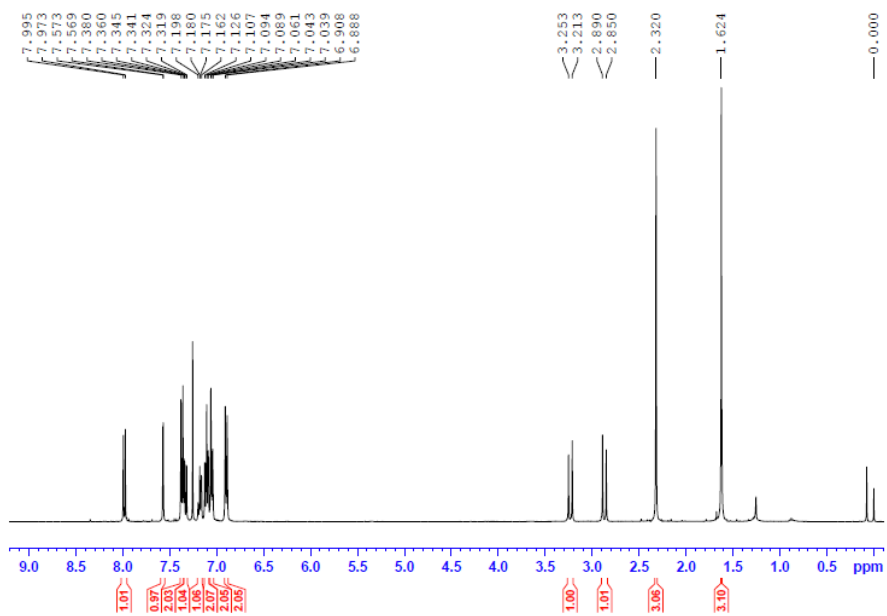

CDCl<sub>3</sub>, <sup>13</sup>C NMR, 100 MHz

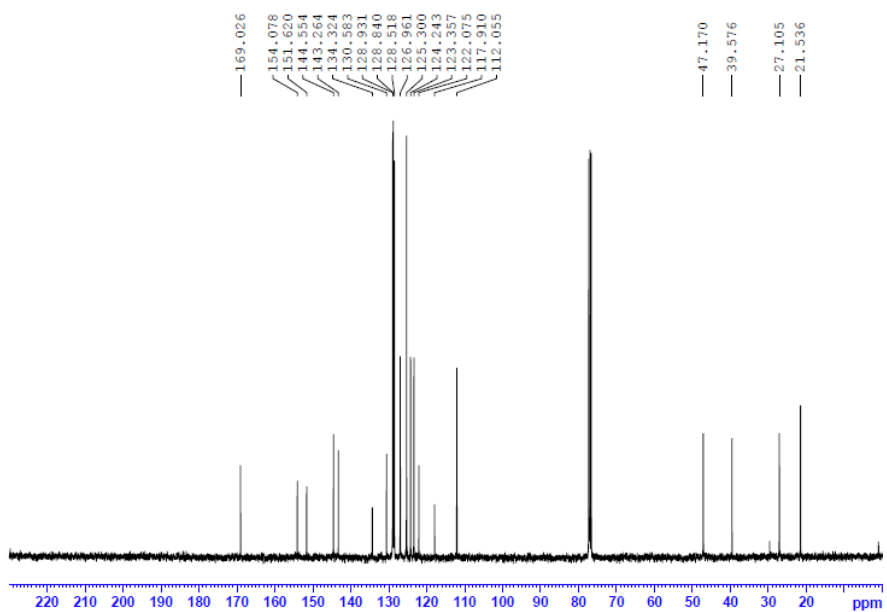

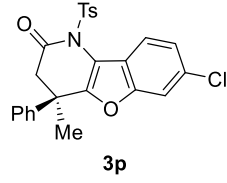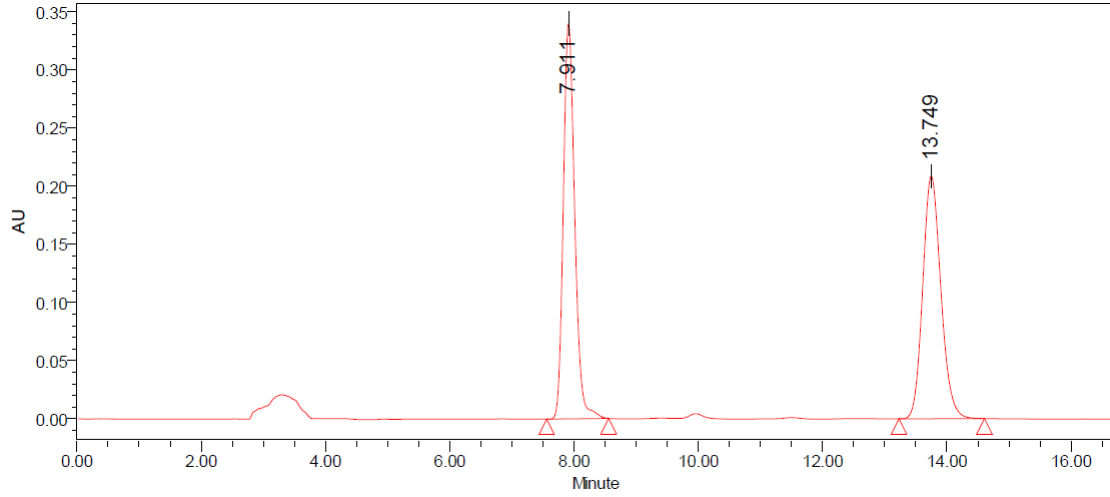

|   | RT<br>(分钟) | Area<br>(微伏*秒) | % Area | Height<br>(微伏) | % Height | Start Time<br>(分钟) | End Time<br>(分钟) |
|---|------------|----------------|--------|----------------|----------|--------------------|------------------|
| 1 | 7.911      | 4325396        | 50.59  | 339815         | 61.97    | 7.560              | 8.558            |
| 2 | 13.749     | 4224622        | 49.41  | 208524         | 38.03    | 13.228             | 14.605           |

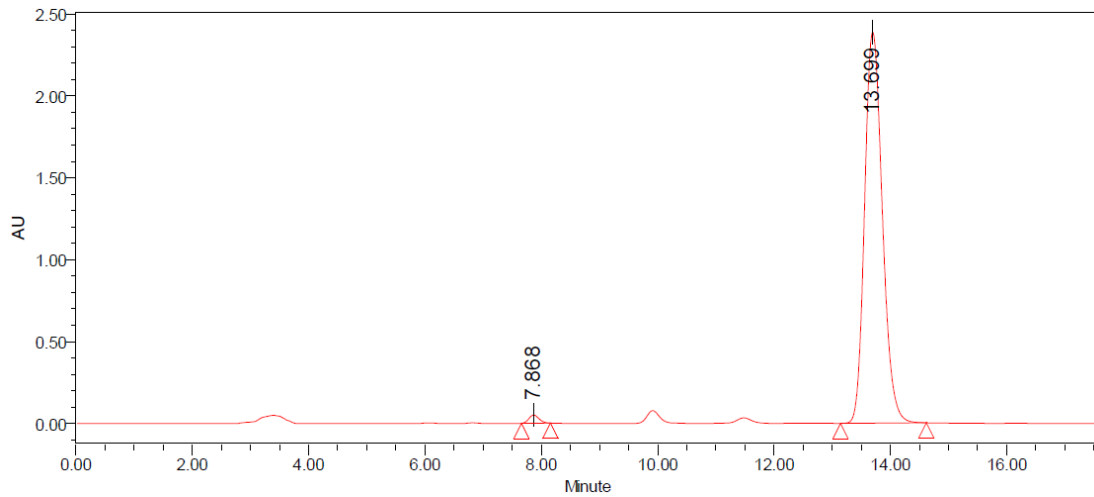

|   | RT<br>(分钟) | Area<br>(微伏*秒) | % Area | Height<br>(微伏) | % Height | Start Time<br>(分钟) | End Time<br>(分钟) |
|---|------------|----------------|--------|----------------|----------|--------------------|------------------|
| 1 | 7.868      | 599442         | 1.17   | 49661          | 2.04     | 7.658              | 8.157            |
| 2 | 13.699     | 50550294       | 98.83  | 2386212        | 97.96    | 13.143             | 14.620           |



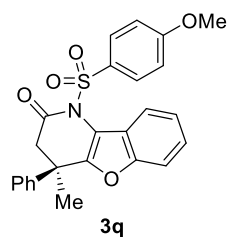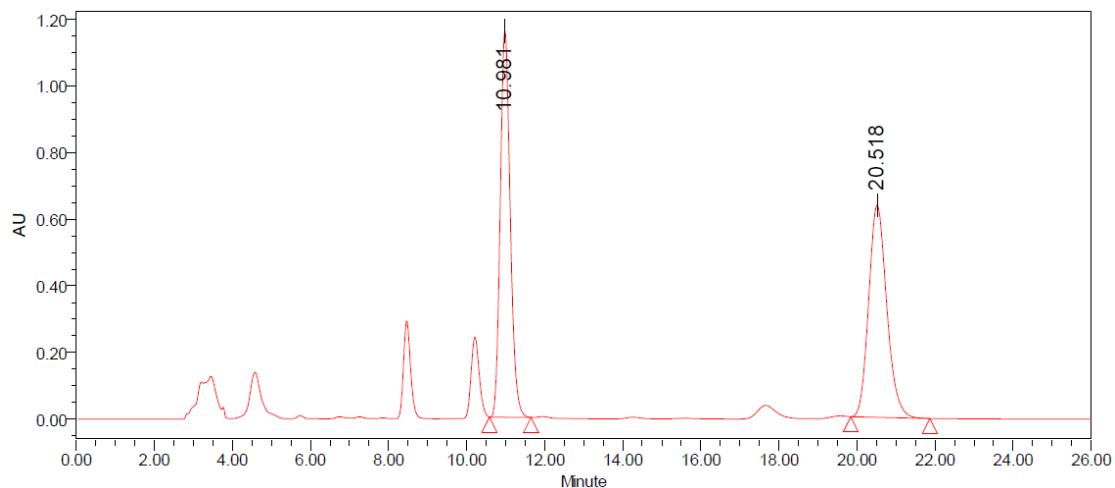

|   | RT<br>(分钟) | Area<br>(微伏*秒) | % Area | Height<br>(微伏) | % Height | Start Time<br>(分钟) | End Time<br>(分钟) |
|---|------------|----------------|--------|----------------|----------|--------------------|------------------|
| 1 | 10.981     | 20595299       | 50.15  | 1159684        | 64.58    | 10.585             | 11.648           |
| 2 | 20.518     | 20473122       | 49.85  | 636095         | 35.42    | 19.843             | 21.868           |

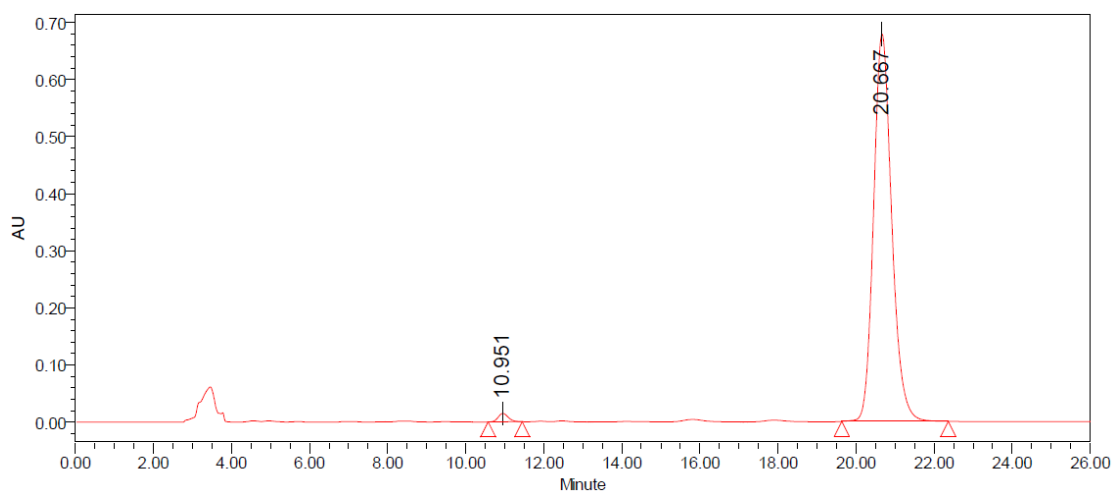

|   | RT<br>(分钟) | Area<br>(微伏*秒) | % Area | Height<br>(微伏) | % Height | Start Time<br>(分钟) | End Time<br>(分钟) |
|---|------------|----------------|--------|----------------|----------|--------------------|------------------|
| 1 | 10.951     | 266170         | 1.20   | 14803          | 2.14     | 10.577             | 11.448           |
| 2 | 20.667     | 21918646       | 98.80  | 678432         | 97.86    | 19.633             | 22.363           |

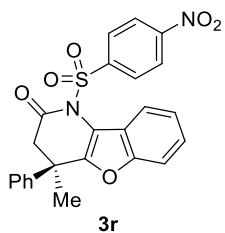

$\text{CDCl}_3$ ,  $^1\text{H NMR}$ , 400 MHz

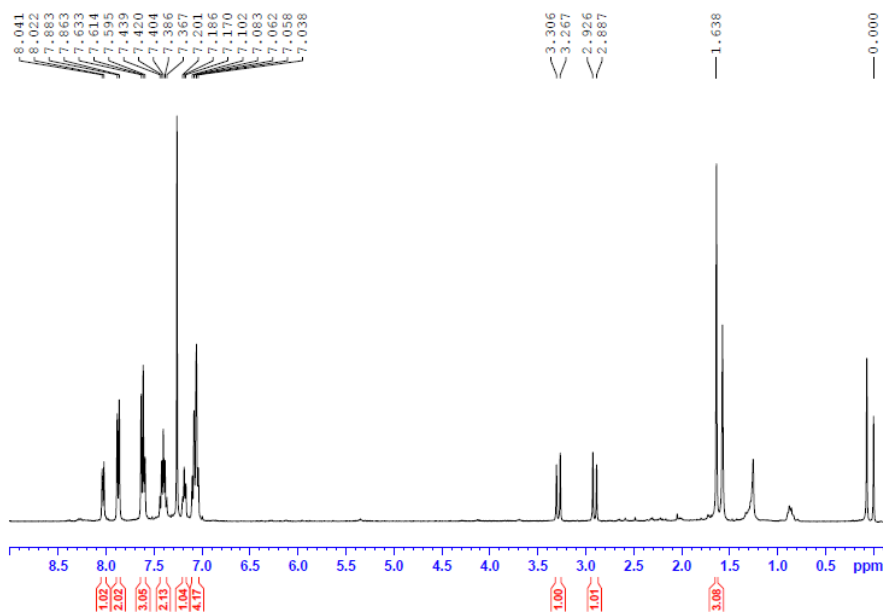

$\text{CDCl}_3$ ,  $^{13}\text{C NMR}$ , 100 MHz

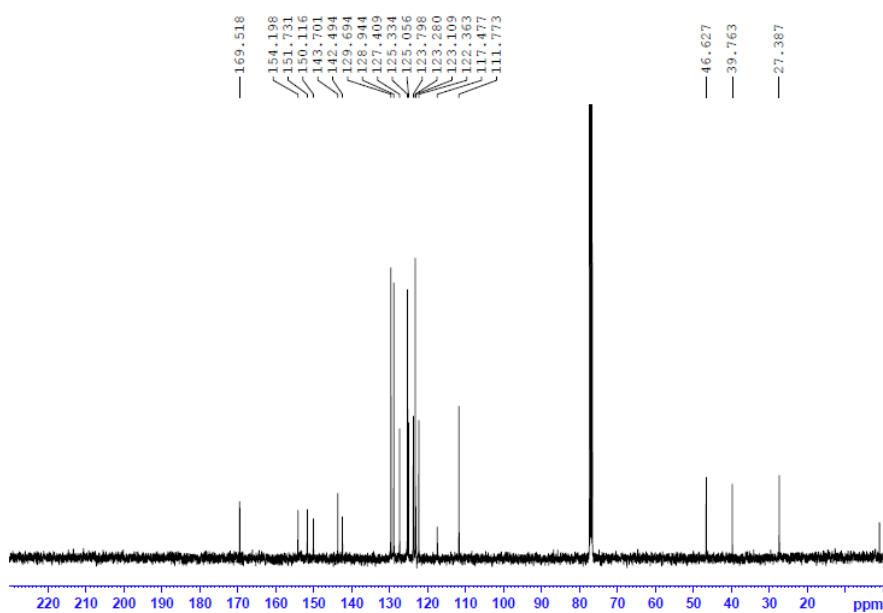

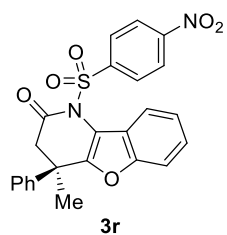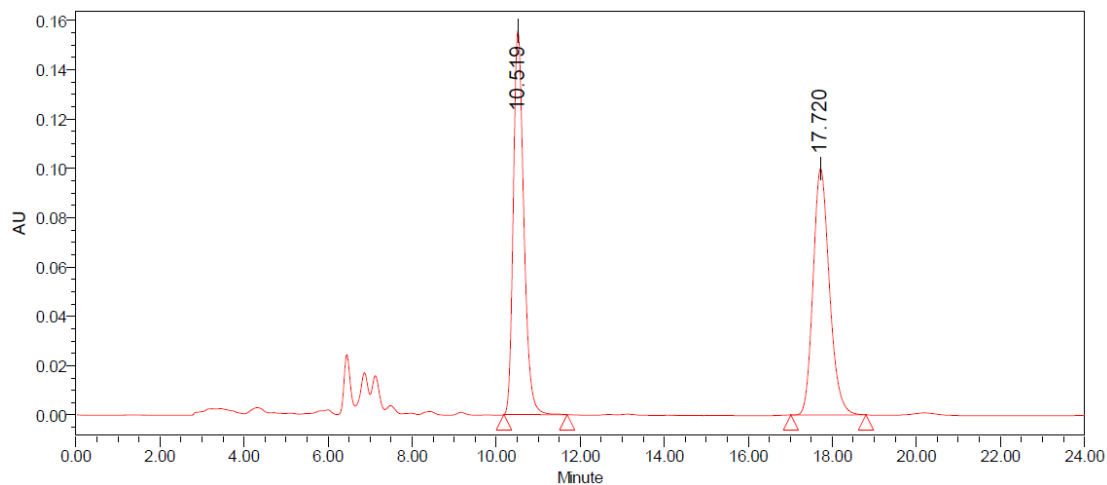

|   | RT<br>(分钟) | Area<br>(微伏*秒) | % Area | Height<br>(微伏) | % Height | Start Time<br>(分钟) | End Time<br>(分钟) |
|---|------------|----------------|--------|----------------|----------|--------------------|------------------|
| 1 | 10.519     | 2701996        | 50.05  | 155680         | 60.92    | 10.187             | 11.690           |
| 2 | 17.720     | 2696220        | 49.95  | 99872          | 39.08    | 17.013             | 18.800           |

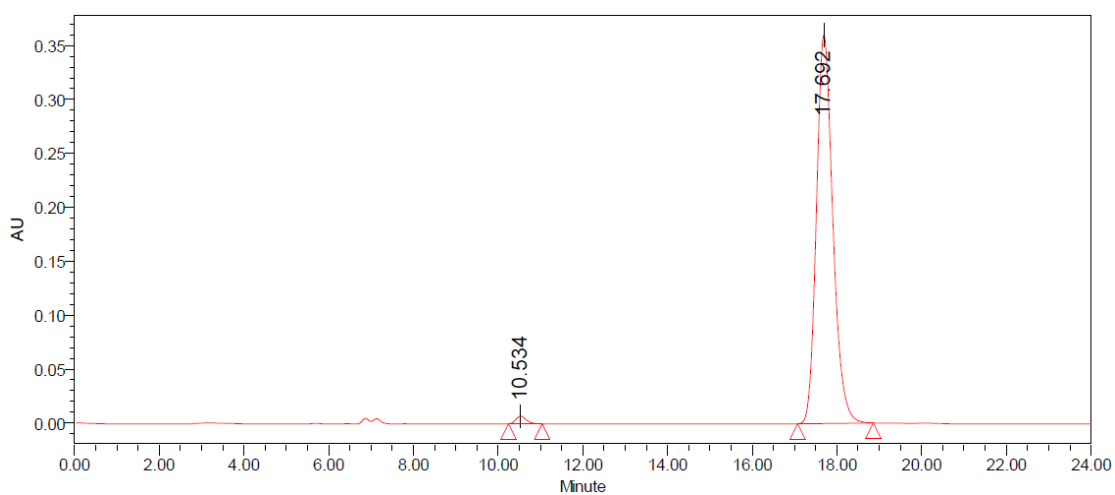

|   | RT<br>(分钟) | Area<br>(微伏*秒) | % Area | Height<br>(微伏) | % Height | Start Time<br>(分钟) | End Time<br>(分钟) |
|---|------------|----------------|--------|----------------|----------|--------------------|------------------|
| 1 | 10.534     | 120331         | 1.22   | 7104           | 1.93     | 10.247             | 11.040           |
| 2 | 17.692     | 9714534        | 98.78  | 360188         | 98.07    | 17.073             | 18.858           |

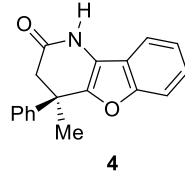

CDCl<sub>3</sub>, <sup>1</sup>H NMR, 400 MHz

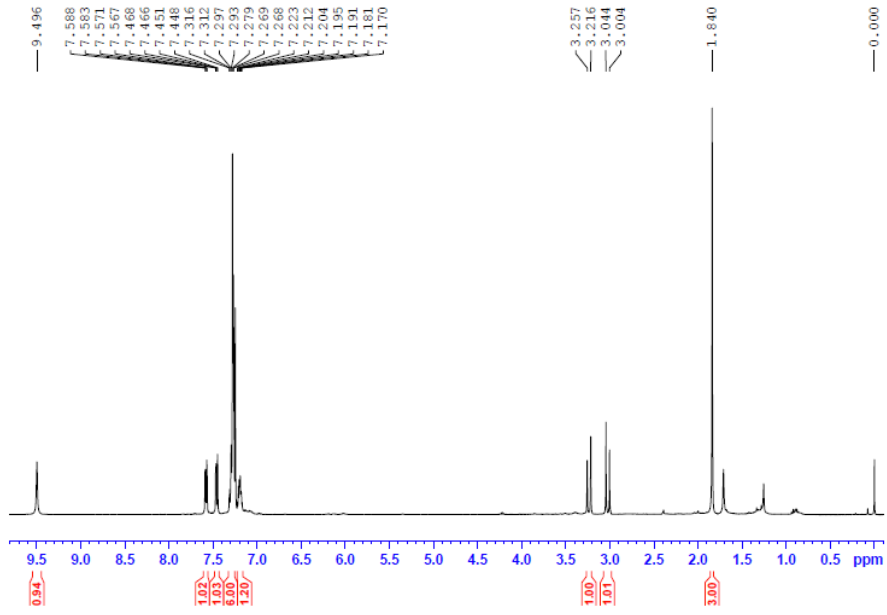

CDCl<sub>3</sub>, <sup>13</sup>C NMR, 100 MHz

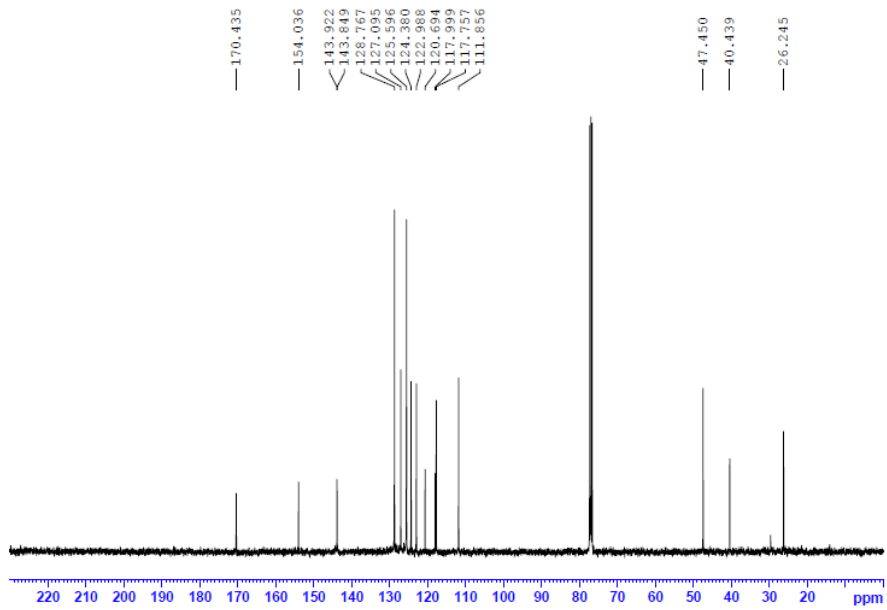



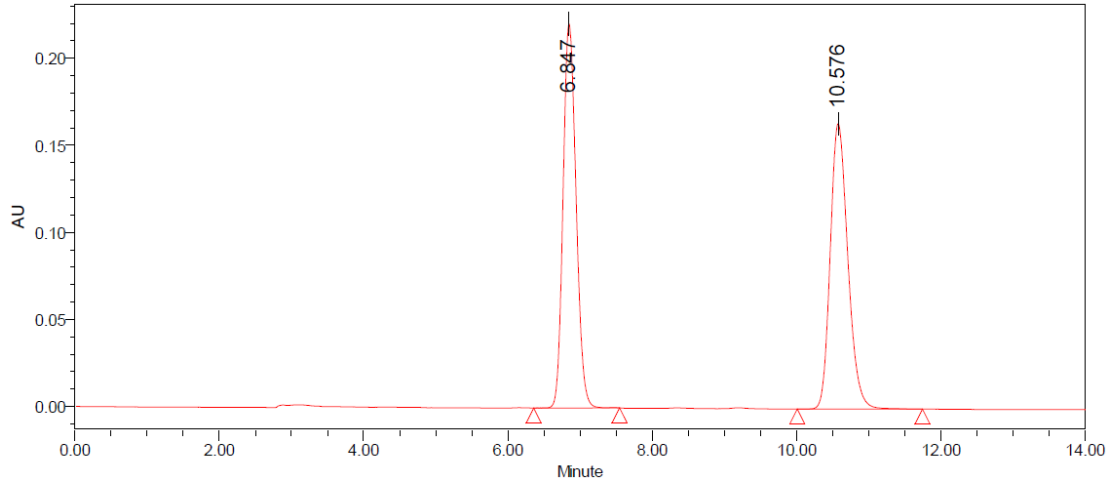

|   | RT<br>(分钟) | Area<br>(微伏*秒) | % Area | Height<br>(微伏) | % Height | Start Time<br>(分钟) | End Time<br>(分钟) |
|---|------------|----------------|--------|----------------|----------|--------------------|------------------|
| 1 | 6.847      | 2764066        | 49.90  | 220657         | 57.39    | 6.357              | 7.547            |
| 2 | 10.576     | 2775221        | 50.10  | 163858         | 42.61    | 10.008             | 11.743           |

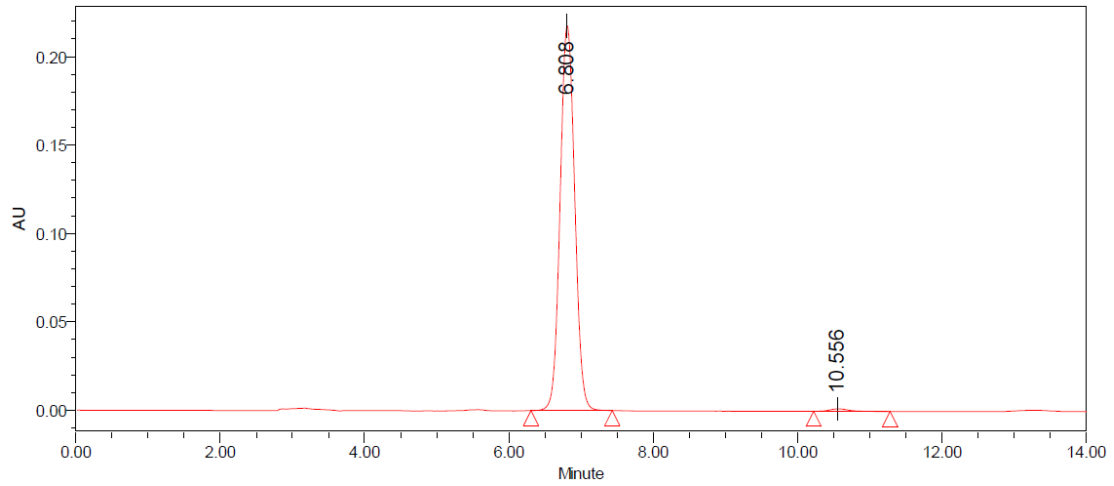

|   | RT<br>(分钟) | Area<br>(微伏*秒) | % Area | Height<br>(微伏) | % Height | Start Time<br>(分钟) | End Time<br>(分钟) |
|---|------------|----------------|--------|----------------|----------|--------------------|------------------|
| 1 | 6.808      | 3056706        | 99.22  | 217568         | 99.36    | 6.307              | 7.432            |
| 2 | 10.556     | 23949          | 0.78   | 1409           | 0.64     | 10.223             | 11.282           |

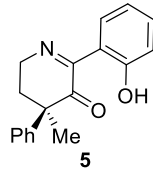

CDCl<sub>3</sub>, <sup>1</sup>H NMR, 400 MHz

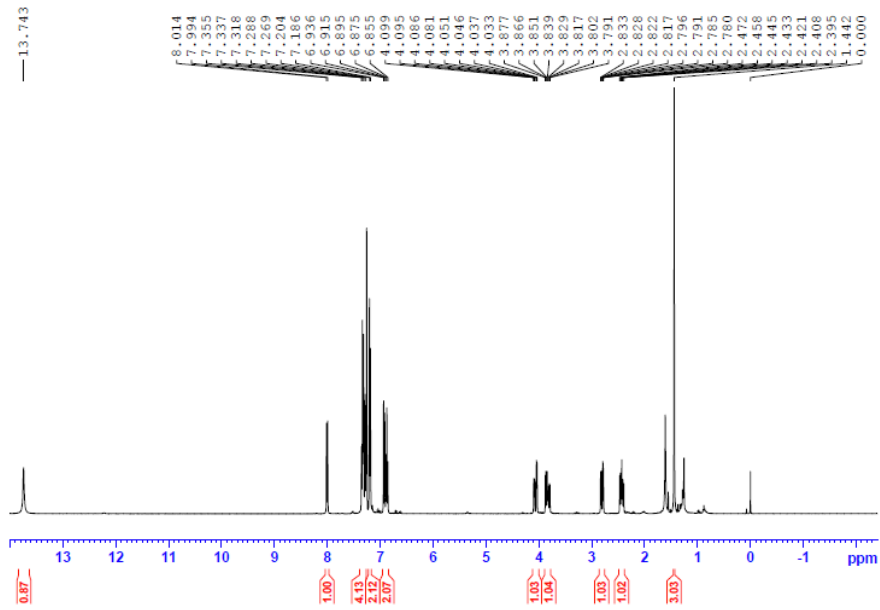

CDCl<sub>3</sub>, <sup>13</sup>C NMR, 100 MHz

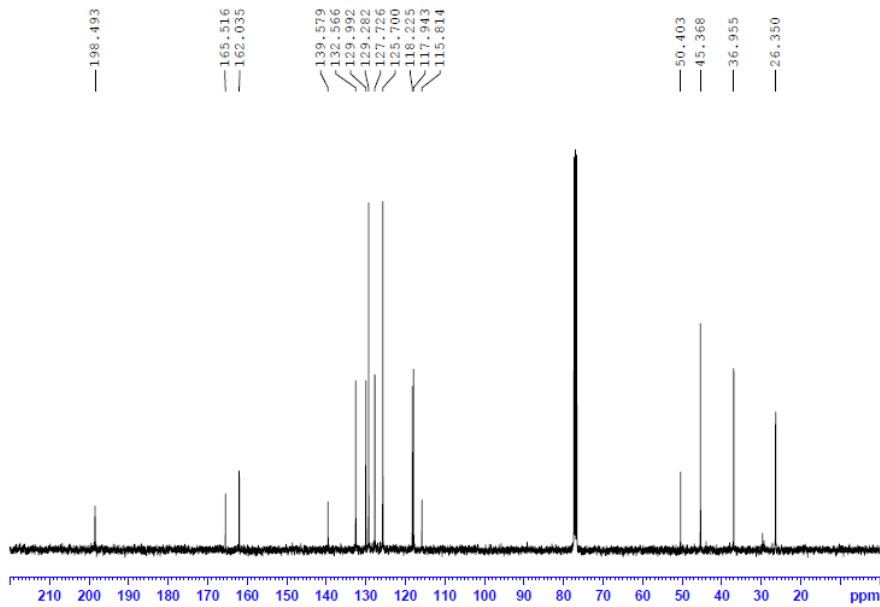

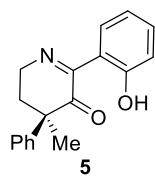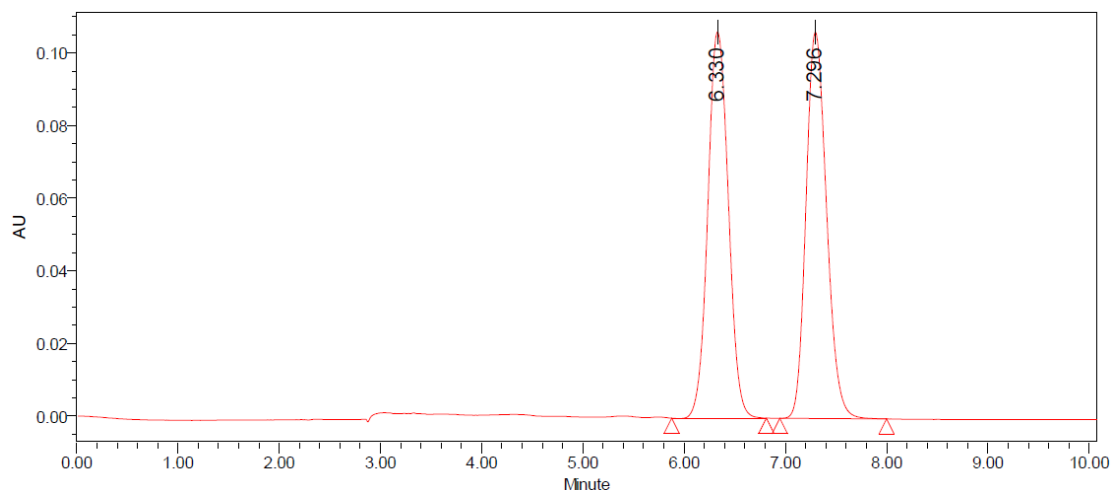

|   | RT<br>(分钟) | Area<br>(微伏*秒) | % Area | Height<br>(微伏) | % Height | Start Time<br>(分钟) | End Time<br>(分钟) |
|---|------------|----------------|--------|----------------|----------|--------------------|------------------|
| 1 | 6.330      | 1497800        | 49.94  | 106338         | 49.98    | 5.877              | 6.812            |
| 2 | 7.296      | 1501122        | 50.06  | 106429         | 50.02    | 6.945              | 7.998            |

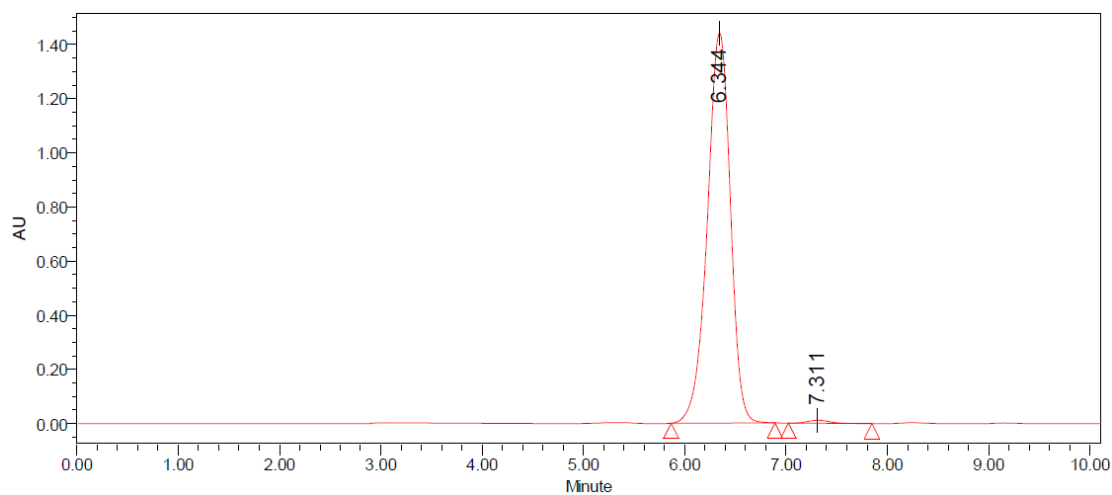

|   | RT<br>(分钟) | Area<br>(微伏*秒) | % Area | Height<br>(微伏) | % Height | Start Time<br>(分钟) | End Time<br>(分钟) |
|---|------------|----------------|--------|----------------|----------|--------------------|------------------|
| 1 | 6.344      | 22764210       | 99.30  | 1439731        | 99.25    | 5.865              | 6.892            |
| 2 | 7.311      | 160286         | 0.70   | 10820          | 0.75     | 7.023              | 7.847            |
